# Supplementary material for: Large-scale phenotyping of 1,000 fungal strains for the degradation of non-natural, industrial compounds
Source: Research Square preprint supplement (doi:10.21203/rs.3.rs-289168/v1), 2021-03-22
Supplement: Supplementary file 1 [file 18f4398c1c6ab09a5d84b654.xlsx]

## Sheet: Overview
	Families	Significantly higher than… (see related Box plots in Fig. 5 in the main text)
AVI	Phanerochaetaceae	Aspergillaceae, Bionectriaceae, Nectriaceae, Pleosporaceae, Diatrypaceae, Xylariaceae, Agaricaceae, Gloeophyllaceae, Hymenochaetaceae, Fomitopsidaceae
	Polyporaceae	Bionectriaceae, Nectriaceae, Pleosporaceae, Diatrypaceae, Xylariaceae, Agaricaceae, Gloeophyllaceae, Fomitopsidaceae
	Meruliaceae	Nectriaceae, Diatrypaceae, Agaricaceae, Gloeophyllaceae, Fomitopsidaceae
	Pleurotaceae	Bionectriaceae, Diatrypaceae, Agaricaceae, Gloeophyllaceae
LGS	Ganodermataceae	All the ascomycetes families, Omphalotaceae, Psathyrellaceae, Gloeophyllaceae, Hymenochaetaceae, Fomitopsidaceae, Phanerochaetaceae
	Pleurotaceae	All the ascomycetes families, except the Diatrypaceae, Omphalotaceae, Gloeophyllaceae, Psathyrellaceae, Fomitopsidaceae, Phanerochaetaceae
	Agaricaceae	All the ascomycetes families, except the Diatrypaceae, Gloeophyllaceae, Psathyrellaceae, Meruliaceae, Omphalotaceae, Fomitopsidaceae, Phanerochaetaceae
	Polyporaceae	All the ascomycetes families, except the Diatrypaceae, Omphalotaceae, Gloeophyllaceae, Psathyrellaceae, Fomitopsidaceae, Phanerochaetaceae
	Hymenochaetaceae	Aspergillaceae, Bionectriaceae, Hypocreaceae, Nectriaceae, Omphalotaceae, Gloeophyllaceae, Fomitopsidaceae, Phanerochaetaceae
RB5	Meruliaceae	All the ascomycetes families, except the Pleosporaceae, Agaricaceae, Omphalotaceae, Stereaceae
	Hymenochaetaceae	All the ascomycetes families, except the Pleosporaceae, Agaricaceae
	Polyporaceae	All the ascomycetes families, except the Pleosporaceae, Agaricaceae
	Pleurotaceae	All the ascomycetes families, except the Nectriaceae, Pleosporaceae and Diatrypaceae
BB41	Gloeophyllaceae	Aspergillaceae, Agaricaceae, Ganodermataceae, Phanerochaetaceae, Polyporaceae, Hypocreaceae, Pleurotaceae, Psathyrellaceae, Strophariaceae
	Xylariaceae	Aspergillaceae, Agaricaceae, Ganodermataceae, Polyporaceae, Hypocreaceae, Pleurotaceae, Psathyrellaceae, Strophariaceae
	Nectriaceae	Hypocreaceae, Pleurotaceae, Psathyrellaceae, Strophariaceae
	Fomitopsidaceae	Hypocreaceae, Pleurotaceae, Psathyrellaceae, Strophariaceae
IMP	Pleosporaceae	Diatrypaceae, Xylariaceae, All the basidiomyctes families except Gloeophyllaceae and Hymenochaetaceae
	Aspergillaceae	Xylariaceae, Fomitopsidaceae, Ganodermataceae, Meruliaceae, Phanerochaetaceae, Polyporaceae, Pleurotaceae
	Nectriaceae	Xylariaceae, Fomitopsidaceae, Ganodermataceae, Meruliaceae, Phanerochaetaceae, Polyporaceae, Pleurotaceae
	Hypocreaceae	Phanerochaetaceae, Polyporaceae, , Pleurotaceae
	Hymenochaetaceae	Phanerochaetaceae, Polyporaceae, , Pleurotaceae
	Agaricaceae	Phanerochaetaceae, Polyporaceae, , Pleurotaceae

## Sheet: AVI
# A tibble: 20 x 11										# A tibble: 190 x 9
Family variable n min max median iqr mean sd se ci										.y. group1 group2 n1 n2 statistic p p.adj p.adj.signif
<fct> <chr> <dbl> <dbl> <dbl> <dbl> <dbl> <dbl> <dbl> <dbl> <dbl>										<chr> <chr> <chr> <int> <int> <dbl> <dbl> <dbl> <chr>
1 Aspergillaceae AVI 63 0 3 1 1 1.25 0.842 0.106 0.212										1 AVI Aspergillaceae Bionectriaceae 63 20 1011 1.76e- 5 3.00e- 3 **
2 Bionectriaceae AVI 20 0 1 0 1 0.3 0.47 0.105 0.22										2 AVI Aspergillaceae Hypocreaceae 63 15 498. 7.42e- 1 1.00e+ 0 ns
3 Hypocreaceae AVI 15 0 4 1 2 1.27 1.34 0.345 0.739										3 AVI Aspergillaceae Nectriaceae 63 97 4315 2.69e- 6 5.11e- 4 ***
4 Nectriaceae AVI 97 0 3 0 1 0.608 0.785 0.08 0.158										4 AVI Aspergillaceae Pleosporaceae 63 15 630 3.40e- 2 1.00e+ 0 ns
5 Pleosporaceae AVI 15 0 2 1 1 0.733 0.799 0.206 0.442										5 AVI Aspergillaceae Diatrypaceae 63 17 894 7.78e- 6 1.00e- 3 **
6 Diatrypaceae AVI 17 0 1 0 0 0.176 0.393 0.095 0.202										6 AVI Aspergillaceae Xylariaceae 63 58 2256. 1.90e- 2 1.00e+ 0 ns
7 Xylariaceae AVI 58 0 4 1 2 0.948 1.16 0.152 0.305										7 AVI Aspergillaceae Agaricaceae 63 92 4197 3.97e- 7 7.54e- 5 ****
8 Agaricaceae AVI 92 0 2 0 1 0.543 0.717 0.075 0.149										8 AVI Aspergillaceae Omphalotaceae 63 18 742. 3.60e- 2 1.00e+ 0 ns
9 Omphalotaceae AVI 18 0 4 0 1 0.833 1.2 0.283 0.597										9 AVI Aspergillaceae Pleurotaceae 63 13 337 2.85e- 1 1.00e+ 0 ns
10 Pleurotaceae AVI 13 0 3 2 1 1.54 0.877 0.243 0.53										10 AVI Aspergillaceae Psathyrellaceae 63 13 537 6.30e- 2 1.00e+ 0 ns
11 Psathyrellaceae AVI 13 0 3 0 1 0.769 1.01 0.281 0.612										11 AVI Aspergillaceae Strophariaceae 63 18 703 1.03e- 1 1.00e+ 0 ns
12 Strophariaceae AVI 18 0 3 0.5 1.75 0.889 1.08 0.254 0.536										12 AVI Aspergillaceae Gloeophyllaceae 63 20 1054. 1.53e- 6 2.91e- 4 ***
13 Gloeophyllaceae AVI 20 0 2 0 0 0.15 0.489 0.109 0.229										13 AVI Aspergillaceae Hymenochaetaceae 63 46 1622. 2.66e- 1 1.00e+ 0 ns
14 Hymenochaetaceae AVI 46 0 3 1 2 1.09 1.21 0.178 0.359										14 AVI Aspergillaceae Fomitopsidaceae 63 42 1970. 6.61e- 6 1.00e- 3 **
15 Fomitopsidaceae AVI 42 0 3 0 1 0.476 0.89 0.137 0.277										15 AVI Aspergillaceae Ganodermataceae 63 38 1216. 8.89e- 1 1.00e+ 0 ns
16 Ganodermataceae AVI 38 0 4 1 2 1.29 1.23 0.199 0.404										16 AVI Aspergillaceae Meruliaceae 63 42 1146. 2.28e- 1 1.00e+ 0 ns
17 Meruliaceae AVI 42 0 4 2 3 1.60 1.38 0.213 0.43										17 AVI Aspergillaceae Phanerochaetaceae 63 28 397 1.35e- 5 3.00e- 3 **
18 Phanerochaetaceae AVI 28 0 4 3 1 2.39 1.23 0.232 0.476										18 AVI Aspergillaceae Polyporaceae 63 233 5697 5.00e- 3 9.61e- 1 ns
19 Polyporaceae AVI 233 0 4 2 3 1.80 1.40 0.091 0.18										19 AVI Aspergillaceae Stereaceae 63 12 323 4.05e- 1 1.00e+ 0 ns
20 Stereaceae AVI 12 0 4 1 2 1.67 1.30 0.376 0.828										20 AVI Bionectriaceae Hypocreaceae 20 15 87 2.00e- 2 1.00e+ 0 ns
										21 AVI Bionectriaceae Nectriaceae 20 97 789 1.38e- 1 1.00e+ 0 ns
										22 AVI Bionectriaceae Pleosporaceae 20 15 106 9.50e- 2 1.00e+ 0 ns
										23 AVI Bionectriaceae Diatrypaceae 20 17 191 4.01e- 1 1.00e+ 0 ns
										24 AVI Bionectriaceae Xylariaceae 20 58 406 2.90e- 2 1.00e+ 0 ns
										25 AVI Bionectriaceae Agaricaceae 20 92 780 2.22e- 1 1.00e+ 0 ns
										26 AVI Bionectriaceae Omphalotaceae 20 18 142 1.99e- 1 1.00e+ 0 ns
										27 AVI Bionectriaceae Pleurotaceae 20 13 35 1.69e- 4 3.20e- 2 *
										28 AVI Bionectriaceae Psathyrellaceae 20 13 100 2.01e- 1 1.00e+ 0 ns
										29 AVI Bionectriaceae Strophariaceae 20 18 129 9.00e- 2 1.00e+ 0 ns
										30 AVI Bionectriaceae Gloeophyllaceae 20 20 237 1.55e- 1 1.00e+ 0 ns
										31 AVI Bionectriaceae Hymenochaetaceae 20 46 307 1.90e- 2 1.00e+ 0 ns
										32 AVI Bionectriaceae Fomitopsidaceae 20 42 411 8.72e- 1 1.00e+ 0 ns
										33 AVI Bionectriaceae Ganodermataceae 20 38 206 2.00e- 3 4.43e- 1 ns
										34 AVI Bionectriaceae Meruliaceae 20 42 197 3.96e- 4 7.50e- 2 ns
										35 AVI Bionectriaceae Phanerochaetaceae 20 28 48 5.63e- 7 1.07e- 4 ***
										36 AVI Bionectriaceae Polyporaceae 20 233 915 3.70e- 6 7.03e- 4 ***
										37 AVI Bionectriaceae Stereaceae 20 12 41 8.22e- 4 1.56e- 1 ns
										38 AVI Hypocreaceae Nectriaceae 15 97 924. 6.50e- 2 1.00e+ 0 ns
										39 AVI Hypocreaceae Pleosporaceae 15 15 135 3.34e- 1 1.00e+ 0 ns
										40 AVI Hypocreaceae Diatrypaceae 15 17 190. 6.00e- 3 1.00e+ 0 ns
										41 AVI Hypocreaceae Xylariaceae 15 58 494. 3.99e- 1 1.00e+ 0 ns
										42 AVI Hypocreaceae Agaricaceae 15 92 897 3.80e- 2 1.00e+ 0 ns
										43 AVI Hypocreaceae Omphalotaceae 15 18 162. 3.14e- 1 1.00e+ 0 ns
										44 AVI Hypocreaceae Pleurotaceae 15 13 80 4.15e- 1 1.00e+ 0 ns
										45 AVI Hypocreaceae Psathyrellaceae 15 13 118. 3.39e- 1 1.00e+ 0 ns
										46 AVI Hypocreaceae Strophariaceae 15 18 156. 4.43e- 1 1.00e+ 0 ns
										47 AVI Hypocreaceae Gloeophyllaceae 15 20 228 2.00e- 3 3.15e- 1 ns
										48 AVI Hypocreaceae Hymenochaetaceae 15 46 370. 6.57e- 1 1.00e+ 0 ns
										49 AVI Hypocreaceae Fomitopsidaceae 15 42 428. 1.80e- 2 1.00e+ 0 ns
										50 AVI Hypocreaceae Ganodermataceae 15 38 278. 9.02e- 1 1.00e+ 0 ns
										51 AVI Hypocreaceae Meruliaceae 15 42 273 4.36e- 1 1.00e+ 0 ns
										52 AVI Hypocreaceae Phanerochaetaceae 15 28 112. 1.10e- 2 1.00e+ 0 ns
										53 AVI Hypocreaceae Polyporaceae 15 233 1372. 1.54e- 1 1.00e+ 0 ns
										54 AVI Hypocreaceae Stereaceae 15 12 72.5 3.92e- 1 1.00e+ 0 ns
										55 AVI Nectriaceae Pleosporaceae 97 15 656. 5.03e- 1 1.00e+ 0 ns
										56 AVI Nectriaceae Diatrypaceae 97 17 1066. 2.90e- 2 1.00e+ 0 ns
										57 AVI Nectriaceae Xylariaceae 97 58 2442 1.32e- 1 1.00e+ 0 ns
										58 AVI Nectriaceae Agaricaceae 97 92 4617 6.43e- 1 1.00e+ 0 ns
										59 AVI Nectriaceae Omphalotaceae 97 18 831 7.21e- 1 1.00e+ 0 ns
										60 AVI Nectriaceae Pleurotaceae 97 13 282. 4.41e- 4 8.40e- 2 ns
										61 AVI Nectriaceae Psathyrellaceae 97 13 592. 6.98e- 1 1.00e+ 0 ns
										62 AVI Nectriaceae Strophariaceae 97 18 770 3.81e- 1 1.00e+ 0 ns
										63 AVI Nectriaceae Gloeophyllaceae 97 20 1296. 6.00e- 3 1.00e+ 0 ns
										64 AVI Nectriaceae Hymenochaetaceae 97 46 1812. 4.80e- 2 1.00e+ 0 ns
										65 AVI Nectriaceae Fomitopsidaceae 97 42 2318. 1.40e- 1 1.00e+ 0 ns
										66 AVI Nectriaceae Ganodermataceae 97 38 1279 3.00e- 3 5.24e- 1 ns
										67 AVI Nectriaceae Meruliaceae 97 42 1218. 5.39e- 5 1.00e- 2 *
										68 AVI Nectriaceae Phanerochaetaceae 97 28 362. 3.54e-10 6.73e- 8 ****
										69 AVI Nectriaceae Polyporaceae 97 233 5847 9.14e-13 1.74e-10 ****
										70 AVI Nectriaceae Stereaceae 97 12 294. 2.00e- 3 4.26e- 1 ns
										71 AVI Pleosporaceae Diatrypaceae 15 17 178. 2.60e- 2 1.00e+ 0 ns
										72 AVI Pleosporaceae Xylariaceae 15 58 414 7.64e- 1 1.00e+ 0 ns
										73 AVI Pleosporaceae Agaricaceae 15 92 782 3.55e- 1 1.00e+ 0 ns
										74 AVI Pleosporaceae Omphalotaceae 15 18 140 8.59e- 1 1.00e+ 0 ns
										75 AVI Pleosporaceae Pleurotaceae 15 13 50 2.20e- 2 1.00e+ 0 ns
										76 AVI Pleosporaceae Psathyrellaceae 15 13 100 9.20e- 1 1.00e+ 0 ns
										77 AVI Pleosporaceae Strophariaceae 15 18 130 8.61e- 1 1.00e+ 0 ns
										78 AVI Pleosporaceae Gloeophyllaceae 15 20 214 8.00e- 3 1.00e+ 0 ns
										79 AVI Pleosporaceae Hymenochaetaceae 15 46 304. 4.63e- 1 1.00e+ 0 ns
										80 AVI Pleosporaceae Fomitopsidaceae 15 42 386. 1.29e- 1 1.00e+ 0 ns
										81 AVI Pleosporaceae Ganodermataceae 15 38 217 1.63e- 1 1.00e+ 0 ns
										82 AVI Pleosporaceae Meruliaceae 15 42 205 3.90e- 2 1.00e+ 0 ns
										83 AVI Pleosporaceae Phanerochaetaceae 15 28 61.5 1.14e- 4 2.20e- 2 *
										84 AVI Pleosporaceae Polyporaceae 15 233 990. 4.00e- 3 7.49e- 1 ns
										85 AVI Pleosporaceae Stereaceae 15 12 52 5.50e- 2 1.00e+ 0 ns
										86 AVI Diatrypaceae Xylariaceae 17 58 301 7.00e- 3 1.00e+ 0 ns
										87 AVI Diatrypaceae Agaricaceae 17 92 579 4.90e- 2 1.00e+ 0 ns
										88 AVI Diatrypaceae Omphalotaceae 17 18 106 6.10e- 2 1.00e+ 0 ns
										89 AVI Diatrypaceae Pleurotaceae 17 13 24.5 8.45e- 5 1.60e- 2 *
										90 AVI Diatrypaceae Psathyrellaceae 17 13 74.5 6.50e- 2 1.00e+ 0 ns
										91 AVI Diatrypaceae Strophariaceae 17 18 96 2.70e- 2 1.00e+ 0 ns
										92 AVI Diatrypaceae Gloeophyllaceae 17 20 182. 5.72e- 1 1.00e+ 0 ns
										93 AVI Diatrypaceae Hymenochaetaceae 17 46 230. 6.00e- 3 1.00e+ 0 ns
										94 AVI Diatrypaceae Fomitopsidaceae 17 42 310. 3.12e- 1 1.00e+ 0 ns
										95 AVI Diatrypaceae Ganodermataceae 17 38 152 7.85e- 4 1.49e- 1 ns
										96 AVI Diatrypaceae Meruliaceae 17 42 148. 1.95e- 4 3.70e- 2 *
										97 AVI Diatrypaceae Phanerochaetaceae 17 28 34.5 8.10e- 7 1.54e- 4 ***
										98 AVI Diatrypaceae Polyporaceae 17 233 678 3.31e- 6 6.29e- 4 ***
										99 AVI Diatrypaceae Stereaceae 17 12 27.5 2.74e- 4 5.20e- 2 ns
										100 AVI Xylariaceae Agaricaceae 58 92 3106 6.10e- 2 1.00e+ 0 ns
										101 AVI Xylariaceae Omphalotaceae 58 18 560 6.21e- 1 1.00e+ 0 ns
										102 AVI Xylariaceae Pleurotaceae 58 13 238. 3.00e- 2 1.00e+ 0 ns
										103 AVI Xylariaceae Psathyrellaceae 58 13 404. 6.77e- 1 1.00e+ 0 ns
										104 AVI Xylariaceae Strophariaceae 58 18 530 9.22e- 1 1.00e+ 0 ns
										105 AVI Xylariaceae Gloeophyllaceae 58 20 826 2.00e- 3 2.89e- 1 ns
										106 AVI Xylariaceae Hymenochaetaceae 58 46 1258. 5.95e- 1 1.00e+ 0 ns
										107 AVI Xylariaceae Fomitopsidaceae 58 42 1516. 2.00e- 2 1.00e+ 0 ns
										108 AVI Xylariaceae Ganodermataceae 58 38 921 1.53e- 1 1.00e+ 0 ns
										109 AVI Xylariaceae Meruliaceae 58 42 894 1.80e- 2 1.00e+ 0 ns
										110 AVI Xylariaceae Phanerochaetaceae 58 28 330. 4.48e- 6 8.51e- 4 ***
										111 AVI Xylariaceae Polyporaceae 58 233 4420 2.78e- 5 5.00e- 3 **
										112 AVI Xylariaceae Stereaceae 58 12 229 5.10e- 2 1.00e+ 0 ns
										113 AVI Agaricaceae Omphalotaceae 92 18 762 5.49e- 1 1.00e+ 0 ns
										114 AVI Agaricaceae Pleurotaceae 92 13 247 1.68e- 4 3.20e- 2 *
										115 AVI Agaricaceae Psathyrellaceae 92 13 542 5.41e- 1 1.00e+ 0 ns
										116 AVI Agaricaceae Strophariaceae 92 18 703 2.58e- 1 1.00e+ 0 ns
										117 AVI Agaricaceae Gloeophyllaceae 92 20 1201 1.20e- 2 1.00e+ 0 ns
										118 AVI Agaricaceae Hymenochaetaceae 92 46 1653 2.10e- 2 1.00e+ 0 ns
										119 AVI Agaricaceae Fomitopsidaceae 92 42 2137 2.53e- 1 1.00e+ 0 ns
										120 AVI Agaricaceae Ganodermataceae 92 38 1158 9.61e- 4 1.83e- 1 ns
										121 AVI Agaricaceae Meruliaceae 92 42 1101 1.59e- 5 3.00e- 3 **
										122 AVI Agaricaceae Phanerochaetaceae 92 28 312 9.56e-11 1.82e- 8 ****
										123 AVI Agaricaceae Polyporaceae 92 233 5255 1.26e-13 2.39e-11 ****
										124 AVI Agaricaceae Stereaceae 92 12 261 1.00e- 3 2.01e- 1 ns
										125 AVI Omphalotaceae Pleurotaceae 18 13 66.5 3.50e- 2 1.00e+ 0 ns
										126 AVI Omphalotaceae Psathyrellaceae 18 13 116. 1.00e+ 0 1.00e+ 0 ns
										127 AVI Omphalotaceae Strophariaceae 18 18 153 7.69e- 1 1.00e+ 0 ns
										128 AVI Omphalotaceae Gloeophyllaceae 18 20 243 1.80e- 2 1.00e+ 0 ns
										129 AVI Omphalotaceae Hymenochaetaceae 18 46 366. 4.40e- 1 1.00e+ 0 ns
										130 AVI Omphalotaceae Fomitopsidaceae 18 42 442. 2.16e- 1 1.00e+ 0 ns
										131 AVI Omphalotaceae Ganodermataceae 18 38 265 1.58e- 1 1.00e+ 0 ns
										132 AVI Omphalotaceae Meruliaceae 18 42 259 4.60e- 2 1.00e+ 0 ns
										133 AVI Omphalotaceae Phanerochaetaceae 18 28 95.5 3.18e- 4 6.00e- 2 ns
										134 AVI Omphalotaceae Polyporaceae 18 233 1275 4.00e- 3 8.51e- 1 ns
										135 AVI Omphalotaceae Stereaceae 18 12 64 5.30e- 2 1.00e+ 0 ns
										136 AVI Pleurotaceae Psathyrellaceae 13 13 122 4.60e- 2 1.00e+ 0 ns
										137 AVI Pleurotaceae Strophariaceae 13 18 160. 7.10e- 2 1.00e+ 0 ns
										138 AVI Pleurotaceae Gloeophyllaceae 13 20 230 2.67e- 5 5.00e- 3 **
										139 AVI Pleurotaceae Hymenochaetaceae 13 46 371 1.70e- 1 1.00e+ 0 ns
										140 AVI Pleurotaceae Fomitopsidaceae 13 42 437 2.74e- 4 5.20e- 2 ns
										141 AVI Pleurotaceae Ganodermataceae 13 38 284. 4.20e- 1 1.00e+ 0 ns
										142 AVI Pleurotaceae Meruliaceae 13 42 269 9.43e- 1 1.00e+ 0 ns
										143 AVI Pleurotaceae Phanerochaetaceae 13 28 101 2.00e- 2 1.00e+ 0 ns
										144 AVI Pleurotaceae Polyporaceae 13 233 1352. 5.07e- 1 1.00e+ 0 ns
										145 AVI Pleurotaceae Stereaceae 13 12 77.5 1.00e+ 0 1.00e+ 0 ns
										146 AVI Psathyrellaceae Strophariaceae 13 18 110. 7.94e- 1 1.00e+ 0 ns
										147 AVI Psathyrellaceae Gloeophyllaceae 13 20 178. 2.10e- 2 1.00e+ 0 ns
										148 AVI Psathyrellaceae Hymenochaetaceae 13 46 261 4.61e- 1 1.00e+ 0 ns
										149 AVI Psathyrellaceae Fomitopsidaceae 13 42 322 2.47e- 1 1.00e+ 0 ns
										150 AVI Psathyrellaceae Ganodermataceae 13 38 188. 1.89e- 1 1.00e+ 0 ns
										151 AVI Psathyrellaceae Meruliaceae 13 42 182. 6.10e- 2 1.00e+ 0 ns
										152 AVI Psathyrellaceae Phanerochaetaceae 13 28 61 5.37e- 4 1.02e- 1 ns
										153 AVI Psathyrellaceae Polyporaceae 13 233 885 1.00e- 2 1.00e+ 0 ns
										154 AVI Psathyrellaceae Stereaceae 13 12 45 6.50e- 2 1.00e+ 0 ns
										155 AVI Strophariaceae Gloeophyllaceae 18 20 254. 8.00e- 3 1.00e+ 0 ns
										156 AVI Strophariaceae Hymenochaetaceae 18 46 383 6.26e- 1 1.00e+ 0 ns
										157 AVI Strophariaceae Fomitopsidaceae 18 42 464 1.04e- 1 1.00e+ 0 ns
										158 AVI Strophariaceae Ganodermataceae 18 38 280 2.58e- 1 1.00e+ 0 ns
										159 AVI Strophariaceae Meruliaceae 18 42 270. 7.20e- 2 1.00e+ 0 ns
										160 AVI Strophariaceae Phanerochaetaceae 18 28 96 3.29e- 4 6.30e- 2 ns
										161 AVI Strophariaceae Polyporaceae 18 233 1330. 8.00e- 3 1.00e+ 0 ns
										162 AVI Strophariaceae Stereaceae 18 12 68.5 8.50e- 2 1.00e+ 0 ns
										163 AVI Gloeophyllaceae Hymenochaetaceae 20 46 256. 1.00e- 3 2.38e- 1 ns
										164 AVI Gloeophyllaceae Fomitopsidaceae 20 42 342. 1.08e- 1 1.00e+ 0 ns
										165 AVI Gloeophyllaceae Ganodermataceae 20 38 170 1.58e- 4 3.00e- 2 *
										166 AVI Gloeophyllaceae Meruliaceae 20 42 167 3.81e- 5 7.00e- 3 **
										167 AVI Gloeophyllaceae Phanerochaetaceae 20 28 41 1.49e- 7 2.83e- 5 ****
										168 AVI Gloeophyllaceae Polyporaceae 20 233 771 3.22e- 7 6.12e- 5 ****
										169 AVI Gloeophyllaceae Stereaceae 20 12 30 5.68e- 5 1.10e- 2 *
										170 AVI Hymenochaetaceae Fomitopsidaceae 46 42 1233 1.20e- 2 1.00e+ 0 ns
										171 AVI Hymenochaetaceae Ganodermataceae 46 38 790. 4.27e- 1 1.00e+ 0 ns
										172 AVI Hymenochaetaceae Meruliaceae 46 42 772. 9.00e- 2 1.00e+ 0 ns
										173 AVI Hymenochaetaceae Phanerochaetaceae 46 28 302. 8.37e- 5 1.60e- 2 *
										174 AVI Hymenochaetaceae Polyporaceae 46 233 3844. 2.00e- 3 3.50e- 1 ns
										175 AVI Hymenochaetaceae Stereaceae 46 12 199 1.23e- 1 1.00e+ 0 ns
										176 AVI Fomitopsidaceae Ganodermataceae 42 38 488. 1.00e- 3 1.96e- 1 ns
										177 AVI Fomitopsidaceae Meruliaceae 42 42 476. 8.29e- 5 1.60e- 2 *
										178 AVI Fomitopsidaceae Phanerochaetaceae 42 28 150. 2.32e- 8 4.41e- 6 ****
										179 AVI Fomitopsidaceae Polyporaceae 42 233 2280. 1.36e- 8 2.58e- 6 ****
										180 AVI Fomitopsidaceae Stereaceae 42 12 105 5.56e- 4 1.06e- 1 ns
										181 AVI Ganodermataceae Meruliaceae 38 42 704 3.51e- 1 1.00e+ 0 ns
										182 AVI Ganodermataceae Phanerochaetaceae 38 28 284. 1.00e- 3 1.90e- 1 ns
										183 AVI Ganodermataceae Polyporaceae 38 233 3532 4.00e- 2 1.00e+ 0 ns
										184 AVI Ganodermataceae Stereaceae 38 12 188 3.54e- 1 1.00e+ 0 ns
										185 AVI Meruliaceae Phanerochaetaceae 42 28 394 1.70e- 2 1.00e+ 0 ns
										186 AVI Meruliaceae Polyporaceae 42 233 4497 3.92e- 1 1.00e+ 0 ns
										187 AVI Meruliaceae Stereaceae 42 12 241 8.22e- 1 1.00e+ 0 ns
										188 AVI Phanerochaetaceae Polyporaceae 28 233 4064 2.90e- 2 1.00e+ 0 ns
										189 AVI Phanerochaetaceae Stereaceae 28 12 222. 1.08e- 1 1.00e+ 0 ns
										190 AVI Polyporaceae Stereaceae 233 12 1464 7.79e- 1 1.00e+ 0 ns

## Sheet: LGS
# A tibble: 20 x 11										# A tibble: 190 x 9
Family variable n min max median iqr mean sd se ci										.y. group1 group2 n1 n2 statistic p p.adj p.adj.signif
<fct> <chr> <dbl> <dbl> <dbl> <dbl> <dbl> <dbl> <dbl> <dbl> <dbl>										<chr> <chr> <chr> <int> <int> <dbl> <dbl> <dbl> <chr>
1 Aspergillaceae LGS 63 0 2 0 0 0.111 0.364 0.046 0.092										1 LGS Aspergillaceae Bionectriaceae 63 20 463 5.00e- 3 9.50e- 1 ns
2 Bionectriaceae LGS 20 0 3 0 1 0.6 0.995 0.222 0.466										2 LGS Aspergillaceae Hypocreaceae 63 15 421 2.43e- 1 1.00e+ 0 ns
3 Hypocreaceae LGS 15 0 4 0 0 0.4 1.06 0.273 0.585										3 LGS Aspergillaceae Nectriaceae 63 97 2680. 4.40e- 2 1.00e+ 0 ns
4 Nectriaceae LGS 97 0 2 0 0 0.268 0.55 0.056 0.111										4 LGS Aspergillaceae Pleosporaceae 63 15 168. 7.92e- 8 1.50e- 5 ****
5 Pleosporaceae LGS 15 0 2 1 0.5 0.933 0.704 0.182 0.39										5 LGS Aspergillaceae Diatrypaceae 63 17 91 1.29e-11 2.45e- 9 ****
6 Diatrypaceae LGS 17 0 3 2 1 1.53 0.8 0.194 0.411										6 LGS Aspergillaceae Xylariaceae 63 58 998. 1.14e- 7 2.17e- 5 ****
7 Xylariaceae LGS 58 0 3 1 1 0.793 0.853 0.112 0.224										7 LGS Aspergillaceae Agaricaceae 63 92 286. 6.76e-24 1.28e-21 ****
8 Agaricaceae LGS 92 0 4 2 1 2.13 0.854 0.089 0.177										8 LGS Aspergillaceae Omphalotaceae 63 18 435 1.50e- 2 1.00e+ 0 ns
9 Omphalotaceae LGS 18 0 1 0 1 0.333 0.485 0.114 0.241										9 LGS Aspergillaceae Pleurotaceae 63 13 6.5 2.62e-13 4.98e-11 ****
10 Pleurotaceae LGS 13 1 3 2 1 2.38 0.65 0.18 0.393										10 LGS Aspergillaceae Psathyrellaceae 63 13 194. 1.13e- 5 2.00e- 3 **
11 Psathyrellaceae LGS 13 0 2 1 1 0.769 0.725 0.201 0.438										11 LGS Aspergillaceae Strophariaceae 63 18 210. 2.41e- 8 4.58e- 6 ****
12 Strophariaceae LGS 18 0 3 2 3 1.72 1.32 0.311 0.656										12 LGS Aspergillaceae Gloeophyllaceae 63 20 557 1.72e- 1 1.00e+ 0 ns
13 Gloeophyllaceae LGS 20 0 2 0 0 0.35 0.745 0.167 0.349										13 LGS Aspergillaceae Hymenochaetaceae 63 46 138. 9.33e-19 1.77e-16 ****
14 Hymenochaetaceae LGS 46 0 3 2 1 1.74 0.828 0.122 0.246										14 LGS Aspergillaceae Fomitopsidaceae 63 42 1257 4.38e- 1 1.00e+ 0 ns
15 Fomitopsidaceae LGS 42 0 2 0 0 0.19 0.505 0.078 0.158										15 LGS Aspergillaceae Ganodermataceae 63 38 16 3.62e-20 6.88e-18 ****
16 Ganodermataceae LGS 38 1 4 2 1 2.47 0.687 0.111 0.226										16 LGS Aspergillaceae Meruliaceae 63 42 595 4.64e- 9 8.82e- 7 ****
17 Meruliaceae LGS 42 0 4 1 2 1.14 1.14 0.176 0.355										17 LGS Aspergillaceae Phanerochaetaceae 63 28 712 2.00e- 2 1.00e+ 0 ns
18 Phanerochaetaceae LGS 28 0 2 0 1 0.357 0.621 0.117 0.241										18 LGS Aspergillaceae Polyporaceae 63 233 1199 2.23e-26 4.24e-24 ****
19 Polyporaceae LGS 233 0 4 2 2 1.91 1.00 0.066 0.129										19 LGS Aspergillaceae Stereaceae 63 12 145 7.33e- 7 1.39e- 4 ***
20 Stereaceae LGS 12 0 2 2 2 1.25 0.965 0.279 0.613										20 LGS Bionectriaceae Hypocreaceae 20 15 172 3.67e- 1 1.00e+ 0 ns
										21 LGS Bionectriaceae Nectriaceae 20 97 1118. 1.50e- 1 1.00e+ 0 ns
										22 LGS Bionectriaceae Pleosporaceae 20 15 102. 8.20e- 2 1.00e+ 0 ns
										23 LGS Bionectriaceae Diatrypaceae 20 17 75.5 3.00e- 3 4.79e- 1 ns
										24 LGS Bionectriaceae Xylariaceae 20 58 483 2.28e- 1 1.00e+ 0 ns
										25 LGS Bionectriaceae Agaricaceae 20 92 274. 1.95e- 7 3.70e- 5 ****
										26 LGS Bionectriaceae Omphalotaceae 20 18 192 6.87e- 1 1.00e+ 0 ns
										27 LGS Bionectriaceae Pleurotaceae 20 13 26 6.55e- 5 1.20e- 2 *
										28 LGS Bionectriaceae Psathyrellaceae 20 13 102. 2.69e- 1 1.00e+ 0 ns
										29 LGS Bionectriaceae Strophariaceae 20 18 100. 1.30e- 2 1.00e+ 0 ns
										30 LGS Bionectriaceae Gloeophyllaceae 20 20 228. 3.35e- 1 1.00e+ 0 ns
										31 LGS Bionectriaceae Hymenochaetaceae 20 46 166 2.12e- 5 4.00e- 3 **
										32 LGS Bionectriaceae Fomitopsidaceae 20 42 511 5.50e- 2 1.00e+ 0 ns
										33 LGS Bionectriaceae Ganodermataceae 20 38 71 1.49e- 7 2.83e- 5 ****
										34 LGS Bionectriaceae Meruliaceae 20 42 298. 5.20e- 2 1.00e+ 0 ns
										35 LGS Bionectriaceae Phanerochaetaceae 20 28 305 5.30e- 1 1.00e+ 0 ns
										36 LGS Bionectriaceae Polyporaceae 20 233 887 1.37e- 6 2.60e- 4 ***
										37 LGS Bionectriaceae Stereaceae 20 12 76.5 6.60e- 2 1.00e+ 0 ns
										38 LGS Hypocreaceae Nectriaceae 15 97 721 9.43e- 1 1.00e+ 0 ns
										39 LGS Hypocreaceae Pleosporaceae 15 15 55 9.00e- 3 1.00e+ 0 ns
										40 LGS Hypocreaceae Diatrypaceae 15 17 38 3.52e- 4 6.70e- 2 ns
										41 LGS Hypocreaceae Xylariaceae 15 58 291 3.10e- 2 1.00e+ 0 ns
										42 LGS Hypocreaceae Agaricaceae 15 92 154. 3.02e- 7 5.74e- 5 ****
										43 LGS Hypocreaceae Omphalotaceae 15 18 120 4.99e- 1 1.00e+ 0 ns
										44 LGS Hypocreaceae Pleurotaceae 15 13 14 5.65e- 5 1.10e- 2 *
										45 LGS Hypocreaceae Psathyrellaceae 15 13 59 4.40e- 2 1.00e+ 0 ns
										46 LGS Hypocreaceae Strophariaceae 15 18 66 6.00e- 3 1.00e+ 0 ns
										47 LGS Hypocreaceae Gloeophyllaceae 15 20 149 9.81e- 1 1.00e+ 0 ns
										48 LGS Hypocreaceae Hymenochaetaceae 15 46 79 3.96e- 6 7.52e- 4 ***
										49 LGS Hypocreaceae Fomitopsidaceae 15 42 334 5.97e- 1 1.00e+ 0 ns
										50 LGS Hypocreaceae Ganodermataceae 15 38 39 4.42e- 7 8.40e- 5 ****
										51 LGS Hypocreaceae Meruliaceae 15 42 180. 9.00e- 3 1.00e+ 0 ns
										52 LGS Hypocreaceae Phanerochaetaceae 15 28 194 6.05e- 1 1.00e+ 0 ns
										53 LGS Hypocreaceae Polyporaceae 15 233 502. 1.16e- 6 2.20e- 4 ***
										54 LGS Hypocreaceae Stereaceae 15 12 45 1.40e- 2 1.00e+ 0 ns
										55 LGS Nectriaceae Pleosporaceae 97 15 348. 4.14e- 5 8.00e- 3 **
										56 LGS Nectriaceae Diatrypaceae 97 17 206. 1.93e- 9 3.67e- 7 ****
										57 LGS Nectriaceae Xylariaceae 97 58 1846. 1.84e- 5 3.00e- 3 **
										58 LGS Nectriaceae Agaricaceae 97 92 611 1.56e-27 2.96e-25 ****
										59 LGS Nectriaceae Omphalotaceae 97 18 786 3.67e- 1 1.00e+ 0 ns
										60 LGS Nectriaceae Pleurotaceae 97 13 28 8.30e-12 1.58e- 9 ****
										61 LGS Nectriaceae Psathyrellaceae 97 13 378 2.00e- 3 4.64e- 1 ns
										62 LGS Nectriaceae Strophariaceae 97 18 366. 9.99e- 7 1.90e- 4 ***
										63 LGS Nectriaceae Gloeophyllaceae 97 20 964. 9.60e- 1 1.00e+ 0 ns
										64 LGS Nectriaceae Hymenochaetaceae 97 46 384 1.29e-18 2.45e-16 ****
										65 LGS Nectriaceae Fomitopsidaceae 97 42 2181 3.39e- 1 1.00e+ 0 ns
										66 LGS Nectriaceae Ganodermataceae 97 38 71 6.93e-22 1.32e-19 ****
										67 LGS Nectriaceae Meruliaceae 97 42 1110. 3.85e- 7 7.32e- 5 ****
										68 LGS Nectriaceae Phanerochaetaceae 97 28 1263 4.47e- 1 1.00e+ 0 ns
										69 LGS Nectriaceae Polyporaceae 97 233 2446 1.54e-31 2.93e-29 ****
										70 LGS Nectriaceae Stereaceae 97 12 266. 8.21e- 5 1.60e- 2 *
										71 LGS Pleosporaceae Diatrypaceae 15 17 74.5 3.40e- 2 1.00e+ 0 ns
										72 LGS Pleosporaceae Xylariaceae 15 58 490. 4.30e- 1 1.00e+ 0 ns
										73 LGS Pleosporaceae Agaricaceae 15 92 205 3.00e- 6 5.70e- 4 ***
										74 LGS Pleosporaceae Omphalotaceae 15 18 198 1.20e- 2 1.00e+ 0 ns
										75 LGS Pleosporaceae Pleurotaceae 15 13 16 1.02e- 4 1.90e- 2 *
										76 LGS Pleosporaceae Psathyrellaceae 15 13 110 5.46e- 1 1.00e+ 0 ns
										77 LGS Pleosporaceae Strophariaceae 15 18 85.5 6.70e- 2 1.00e+ 0 ns
										78 LGS Pleosporaceae Gloeophyllaceae 15 20 220. 1.00e- 2 1.00e+ 0 ns
										79 LGS Pleosporaceae Hymenochaetaceae 15 46 172 2.00e- 3 4.08e- 1 ns
										80 LGS Pleosporaceae Fomitopsidaceae 15 42 499 3.45e- 5 7.00e- 3 **
										81 LGS Pleosporaceae Ganodermataceae 15 38 41 4.23e- 7 8.04e- 5 ****
										82 LGS Pleosporaceae Meruliaceae 15 42 298. 7.61e- 1 1.00e+ 0 ns
										83 LGS Pleosporaceae Phanerochaetaceae 15 28 305 7.00e- 3 1.00e+ 0 ns
										84 LGS Pleosporaceae Polyporaceae 15 233 770 1.28e- 4 2.40e- 2 *
										85 LGS Pleosporaceae Stereaceae 15 12 69.5 3.00e- 1 1.00e+ 0 ns
										86 LGS Diatrypaceae Xylariaceae 17 58 716. 3.00e- 3 5.34e- 1 ns
										87 LGS Diatrypaceae Agaricaceae 17 92 466 4.00e- 3 7.37e- 1 ns
										88 LGS Diatrypaceae Omphalotaceae 17 18 267 7.07e- 5 1.30e- 2 *
										89 LGS Diatrypaceae Pleurotaceae 17 13 48.5 5.00e- 3 1.00e+ 0 ns
										90 LGS Diatrypaceae Psathyrellaceae 17 13 166 1.50e- 2 1.00e+ 0 ns
										91 LGS Diatrypaceae Strophariaceae 17 18 127 3.78e- 1 1.00e+ 0 ns
										92 LGS Diatrypaceae Gloeophyllaceae 17 20 285 1.50e- 4 2.80e- 2 *
										93 LGS Diatrypaceae Hymenochaetaceae 17 46 348 4.82e- 1 1.00e+ 0 ns
										94 LGS Diatrypaceae Fomitopsidaceae 17 42 637 3.77e- 8 7.16e- 6 ****
										95 LGS Diatrypaceae Ganodermataceae 17 38 132 1.68e- 4 3.20e- 2 *
										96 LGS Diatrypaceae Meruliaceae 17 42 446. 1.25e- 1 1.00e+ 0 ns
										97 LGS Diatrypaceae Phanerochaetaceae 17 28 406 2.21e- 5 4.00e- 3 **
										98 LGS Diatrypaceae Polyporaceae 17 233 1483 6.70e- 2 1.00e+ 0 ns
										99 LGS Diatrypaceae Stereaceae 17 12 115 5.40e- 1 1.00e+ 0 ns
										100 LGS Xylariaceae Agaricaceae 58 92 822. 7.82e-14 1.49e-11 ****
										101 LGS Xylariaceae Omphalotaceae 58 18 669 5.00e- 2 1.00e+ 0 ns
										102 LGS Xylariaceae Pleurotaceae 58 13 70.5 1.82e- 6 3.46e- 4 ***
										103 LGS Xylariaceae Psathyrellaceae 58 13 372. 9.49e- 1 1.00e+ 0 ns
										104 LGS Xylariaceae Strophariaceae 58 18 308 6.00e- 3 1.00e+ 0 ns
										105 LGS Xylariaceae Gloeophyllaceae 58 20 757 2.50e- 2 1.00e+ 0 ns
										106 LGS Xylariaceae Hymenochaetaceae 58 46 611 7.79e- 7 1.48e- 4 ***
										107 LGS Xylariaceae Fomitopsidaceae 58 42 1707 7.10e- 5 1.30e- 2 *
										108 LGS Xylariaceae Ganodermataceae 58 38 188 1.31e-12 2.49e-10 ****
										109 LGS Xylariaceae Meruliaceae 58 42 1030. 1.63e- 1 1.00e+ 0 ns
										110 LGS Xylariaceae Phanerochaetaceae 58 28 1040 2.00e- 2 1.00e+ 0 ns
										111 LGS Xylariaceae Polyporaceae 58 233 2866 1.23e-12 2.34e-10 ****
										112 LGS Xylariaceae Stereaceae 58 12 253 1.15e- 1 1.00e+ 0 ns
										113 LGS Agaricaceae Omphalotaceae 92 18 1554 5.21e-10 9.90e- 8 ****
										114 LGS Agaricaceae Pleurotaceae 92 13 508 3.37e- 1 1.00e+ 0 ns
										115 LGS Agaricaceae Psathyrellaceae 92 13 1044. 3.11e- 6 5.91e- 4 ***
										116 LGS Agaricaceae Strophariaceae 92 18 918 4.32e- 1 1.00e+ 0 ns
										117 LGS Agaricaceae Gloeophyllaceae 92 20 1663 1.73e- 9 3.29e- 7 ****
										118 LGS Agaricaceae Hymenochaetaceae 92 46 2705 4.00e- 3 8.02e- 1 ns
										119 LGS Agaricaceae Fomitopsidaceae 92 42 3624 1.39e-17 2.64e-15 ****
										120 LGS Agaricaceae Ganodermataceae 92 38 1411 5.80e- 2 1.00e+ 0 ns
										121 LGS Agaricaceae Meruliaceae 92 42 2894. 1.15e- 6 2.18e- 4 ***
										122 LGS Agaricaceae Phanerochaetaceae 92 28 2372 1.36e-12 2.58e-10 ****
										123 LGS Agaricaceae Polyporaceae 92 233 11994. 7.40e- 2 1.00e+ 0 ns
										124 LGS Agaricaceae Stereaceae 92 12 821 3.00e- 3 5.05e- 1 ns
										125 LGS Omphalotaceae Pleurotaceae 18 13 3 2.09e- 6 3.97e- 4 ***
										126 LGS Omphalotaceae Psathyrellaceae 18 13 78 8.00e- 2 1.00e+ 0 ns
										127 LGS Omphalotaceae Strophariaceae 18 18 72 2.00e- 3 4.33e- 1 ns
										128 LGS Omphalotaceae Gloeophyllaceae 18 20 195 5.82e- 1 1.00e+ 0 ns
										129 LGS Omphalotaceae Hymenochaetaceae 18 46 75 1.33e- 7 2.53e- 5 ****
										130 LGS Omphalotaceae Fomitopsidaceae 18 42 444 1.29e- 1 1.00e+ 0 ns
										131 LGS Omphalotaceae Ganodermataceae 18 38 6 1.06e- 9 2.01e- 7 ****
										132 LGS Omphalotaceae Meruliaceae 18 42 225 8.00e- 3 1.00e+ 0 ns
										133 LGS Omphalotaceae Phanerochaetaceae 18 28 258 8.78e- 1 1.00e+ 0 ns
										134 LGS Omphalotaceae Polyporaceae 18 233 456 6.30e- 9 1.20e- 6 ****
										135 LGS Omphalotaceae Stereaceae 18 12 51 8.00e- 3 1.00e+ 0 ns
										136 LGS Pleurotaceae Psathyrellaceae 13 13 158 1.07e- 4 2.00e- 2 *
										137 LGS Pleurotaceae Strophariaceae 13 18 144 2.57e- 1 1.00e+ 0 ns
										138 LGS Pleurotaceae Gloeophyllaceae 13 20 248. 3.36e- 6 6.38e- 4 ***
										139 LGS Pleurotaceae Hymenochaetaceae 13 46 428. 1.30e- 2 1.00e+ 0 ns
										140 LGS Pleurotaceae Fomitopsidaceae 13 42 536 7.68e-10 1.46e- 7 ****
										141 LGS Pleurotaceae Ganodermataceae 13 38 235 7.83e- 1 1.00e+ 0 ns
										142 LGS Pleurotaceae Meruliaceae 13 42 442. 5.85e- 4 1.11e- 1 ns
										143 LGS Pleurotaceae Phanerochaetaceae 13 28 353 2.98e- 7 5.66e- 5 ****
										144 LGS Pleurotaceae Polyporaceae 13 233 1912 9.10e- 2 1.00e+ 0 ns
										145 LGS Pleurotaceae Stereaceae 13 12 128. 4.00e- 3 6.99e- 1 ns
										146 LGS Psathyrellaceae Strophariaceae 13 18 68 4.40e- 2 1.00e+ 0 ns
										147 LGS Psathyrellaceae Gloeophyllaceae 13 20 176 5.00e- 2 1.00e+ 0 ns
										148 LGS Psathyrellaceae Hymenochaetaceae 13 46 124 7.52e- 4 1.43e- 1 ns
										149 LGS Psathyrellaceae Fomitopsidaceae 13 42 400 9.95e- 4 1.89e- 1 ns
										150 LGS Psathyrellaceae Ganodermataceae 13 38 28 6.83e- 7 1.30e- 4 ***
										151 LGS Psathyrellaceae Meruliaceae 13 42 232 3.99e- 1 1.00e+ 0 ns
										152 LGS Psathyrellaceae Phanerochaetaceae 13 28 242 5.40e- 2 1.00e+ 0 ns
										153 LGS Psathyrellaceae Polyporaceae 13 233 579 7.72e- 5 1.50e- 2 *
										154 LGS Psathyrellaceae Stereaceae 13 12 54 1.75e- 1 1.00e+ 0 ns
										155 LGS Strophariaceae Gloeophyllaceae 18 20 280. 1.00e- 3 1.92e- 1 ns
										156 LGS Strophariaceae Hymenochaetaceae 18 46 436. 7.32e- 1 1.00e+ 0 ns
										157 LGS Strophariaceae Fomitopsidaceae 18 42 607 5.14e- 6 9.77e- 4 ***
										158 LGS Strophariaceae Ganodermataceae 18 38 251 8.70e- 2 1.00e+ 0 ns
										159 LGS Strophariaceae Meruliaceae 18 42 475 1.05e- 1 1.00e+ 0 ns
										160 LGS Strophariaceae Phanerochaetaceae 18 28 391 5.35e- 4 1.02e- 1 ns
										161 LGS Strophariaceae Polyporaceae 18 233 2039 8.37e- 1 1.00e+ 0 ns
										162 LGS Strophariaceae Stereaceae 18 12 138. 1.78e- 1 1.00e+ 0 ns
										163 LGS Gloeophyllaceae Hymenochaetaceae 20 46 110. 4.12e- 7 7.83e- 5 ****
										164 LGS Gloeophyllaceae Fomitopsidaceae 20 42 449 5.02e- 1 1.00e+ 0 ns
										165 LGS Gloeophyllaceae Ganodermataceae 20 38 34 3.16e- 9 6.00e- 7 ****
										166 LGS Gloeophyllaceae Meruliaceae 20 42 244 4.00e- 3 7.79e- 1 ns
										167 LGS Gloeophyllaceae Phanerochaetaceae 20 28 264 6.69e- 1 1.00e+ 0 ns
										168 LGS Gloeophyllaceae Polyporaceae 20 233 628 1.15e- 8 2.19e- 6 ****
										169 LGS Gloeophyllaceae Stereaceae 20 12 62 9.00e- 3 1.00e+ 0 ns
										170 LGS Hymenochaetaceae Fomitopsidaceae 46 42 1798 1.98e-13 3.76e-11 ****
										171 LGS Hymenochaetaceae Ganodermataceae 46 38 467 1.02e- 4 1.90e- 2 *
										172 LGS Hymenochaetaceae Meruliaceae 46 42 1295 4.00e- 3 8.28e- 1 ns
										173 LGS Hymenochaetaceae Phanerochaetaceae 46 28 1149 4.77e- 9 9.06e- 7 ****
										174 LGS Hymenochaetaceae Polyporaceae 46 233 4637 1.27e- 1 1.00e+ 0 ns
										175 LGS Hymenochaetaceae Stereaceae 46 12 342. 1.85e- 1 1.00e+ 0 ns
										176 LGS Fomitopsidaceae Ganodermataceae 42 38 26 2.76e-15 5.24e-13 ****
										177 LGS Fomitopsidaceae Meruliaceae 42 42 437 4.71e- 6 8.95e- 4 ***
										178 LGS Fomitopsidaceae Phanerochaetaceae 42 28 506 1.61e- 1 1.00e+ 0 ns
										179 LGS Fomitopsidaceae Polyporaceae 42 233 952 3.89e-18 7.39e-16 ****
										180 LGS Fomitopsidaceae Stereaceae 42 12 107 8.87e- 5 1.70e- 2 *
										181 LGS Ganodermataceae Meruliaceae 38 42 1309 3.46e- 7 6.57e- 5 ****
										182 LGS Ganodermataceae Phanerochaetaceae 38 28 1036 1.21e-11 2.30e- 9 ****
										183 LGS Ganodermataceae Polyporaceae 38 233 5757 2.00e- 3 2.98e- 1 ns
										184 LGS Ganodermataceae Stereaceae 38 12 378 2.14e- 4 4.10e- 2 *
										185 LGS Meruliaceae Phanerochaetaceae 42 28 824 2.00e- 3 4.07e- 1 ns
										186 LGS Meruliaceae Polyporaceae 42 233 2988. 2.50e- 5 5.00e- 3 **
										187 LGS Meruliaceae Stereaceae 42 12 230 6.39e- 1 1.00e+ 0 ns
										188 LGS Phanerochaetaceae Polyporaceae 28 233 804 8.63e-12 1.64e- 9 ****
										189 LGS Phanerochaetaceae Stereaceae 28 12 84 5.00e- 3 9.33e- 1 ns
										190 LGS Polyporaceae Stereaceae 233 12 1892 2.80e- 2 1.00e+ 0 ns

## Sheet: RB5
# A tibble: 20 x 11										A tibble: 190 x 9
Family variable n min max median iqr mean sd se ci										.y. group1 group2 n1 n2 statistic p p.adj p.adj.signif
<fct> <chr> <dbl> <dbl> <dbl> <dbl> <dbl> <dbl> <dbl> <dbl> <dbl>										<chr> <chr> <chr> <int> <int> <dbl> <dbl> <dbl> <chr>
1 Aspergillaceae RB5 63 0 3 0 0 0.095 0.429 0.054 0.108										1 RB5 Aspergillaceae Bionectriaceae 63 20 638. 8.57e- 1 1.00e+ 0 ns
2 Bionectriaceae RB5 20 0 2 0 0 0.1 0.447 0.1 0.209										2 RB5 Aspergillaceae Hypocreaceae 63 15 502. 3.28e- 1 1.00e+ 0 ns
3 Hypocreaceae RB5 15 0 0 0 0 0 0 0 0										3 RB5 Aspergillaceae Nectriaceae 63 97 2536. 5.00e- 3 8.90e- 1 ns
4 Nectriaceae RB5 97 0 3 0 0 0.515 1.02 0.104 0.206										4 RB5 Aspergillaceae Pleosporaceae 63 15 410. 1.10e- 1 1.00e+ 0 ns
5 Pleosporaceae RB5 15 0 1 0 0 0.2 0.414 0.107 0.229										5 RB5 Aspergillaceae Diatrypaceae 63 17 538. 9.44e- 1 1.00e+ 0 ns
6 Diatrypaceae RB5 17 0 1 0 0 0.059 0.243 0.059 0.125										6 RB5 Aspergillaceae Xylariaceae 63 58 1657 1.02e- 1 1.00e+ 0 ns
7 Xylariaceae RB5 58 0 3 0 0 0.259 0.69 0.091 0.181										7 RB5 Aspergillaceae Agaricaceae 63 92 2468 1.10e- 2 1.00e+ 0 ns
8 Agaricaceae RB5 92 0 3 0 0 0.424 0.892 0.093 0.185										8 RB5 Aspergillaceae Omphalotaceae 63 18 508 1.72e- 1 1.00e+ 0 ns
9 Omphalotaceae RB5 18 0 3 0 0 0.278 0.752 0.177 0.374										9 RB5 Aspergillaceae Pleurotaceae 63 13 144. 2.62e- 8 4.95e- 6 ****
10 Pleurotaceae RB5 13 0 4 1 3 1.62 1.50 0.417 0.908										10 RB5 Aspergillaceae Psathyrellaceae 63 13 277 1.00e- 3 2.19e- 1 ns
11 Psathyrellaceae RB5 13 0 3 0 1 0.615 0.961 0.266 0.581										11 RB5 Aspergillaceae Strophariaceae 63 18 372 2.06e- 4 3.90e- 2 *
12 Strophariaceae RB5 18 0 4 0 3 1.28 1.78 0.419 0.883										12 RB5 Aspergillaceae Gloeophyllaceae 63 20 348 4.24e- 6 8.01e- 4 ***
13 Gloeophyllaceae RB5 20 0 4 0.5 2.25 1.1 1.37 0.307 0.642										13 RB5 Aspergillaceae Hymenochaetaceae 63 46 585 6.28e-11 1.19e- 8 ****
14 Hymenochaetaceae RB5 46 0 4 2 4 2.02 1.80 0.265 0.533										14 RB5 Aspergillaceae Fomitopsidaceae 63 42 791 1.52e- 6 2.87e- 4 ***
15 Fomitopsidaceae RB5 42 0 4 0 2 1.02 1.28 0.197 0.398										15 RB5 Aspergillaceae Ganodermataceae 63 38 722 2.68e- 6 5.07e- 4 ***
16 Ganodermataceae RB5 38 0 4 0 2 1.03 1.30 0.212 0.429										16 RB5 Aspergillaceae Meruliaceae 63 42 480. 1.12e-11 2.12e- 9 ****
17 Meruliaceae RB5 42 0 4 3 4 2.26 1.77 0.273 0.551										17 RB5 Aspergillaceae Phanerochaetaceae 63 28 609 1.88e- 4 3.60e- 2 *
18 Phanerochaetaceae RB5 28 0 4 0 3 1.14 1.72 0.324 0.665										18 RB5 Aspergillaceae Polyporaceae 63 233 3487 2.06e-12 3.89e-10 ****
19 Polyporaceae RB5 233 0 4 1 4 1.78 1.74 0.114 0.225										19 RB5 Aspergillaceae Stereaceae 63 12 402 3.83e- 1 1.00e+ 0 ns
20 Stereaceae RB5 12 0 0 0 0 0 0 0 0										20 RB5 Bionectriaceae Hypocreaceae 20 15 158. 4.19e- 1 1.00e+ 0 ns
										21 RB5 Bionectriaceae Nectriaceae 20 97 796. 6.90e- 2 1.00e+ 0 ns
										22 RB5 Bionectriaceae Pleosporaceae 20 15 129 2.16e- 1 1.00e+ 0 ns
										23 RB5 Bionectriaceae Diatrypaceae 20 17 169 9.69e- 1 1.00e+ 0 ns
										24 RB5 Bionectriaceae Xylariaceae 20 58 520. 2.45e- 1 1.00e+ 0 ns
										25 RB5 Bionectriaceae Agaricaceae 20 92 776. 1.01e- 1 1.00e+ 0 ns
										26 RB5 Bionectriaceae Omphalotaceae 20 18 160. 2.72e- 1 1.00e+ 0 ns
										27 RB5 Bionectriaceae Pleurotaceae 20 13 46 1.53e- 4 2.90e- 2 *
										28 RB5 Bionectriaceae Psathyrellaceae 20 13 87.5 2.10e- 2 1.00e+ 0 ns
										29 RB5 Bionectriaceae Strophariaceae 20 18 116. 1.00e- 2 1.00e+ 0 ns
										30 RB5 Bionectriaceae Gloeophyllaceae 20 20 110. 2.00e- 3 3.67e- 1 ns
										31 RB5 Bionectriaceae Hymenochaetaceae 20 46 184 2.18e- 5 4.00e- 3 **
										32 RB5 Bionectriaceae Fomitopsidaceae 20 42 249 2.00e- 3 3.65e- 1 ns
										33 RB5 Bionectriaceae Ganodermataceae 20 38 227 2.00e- 3 4.33e- 1 ns
										34 RB5 Bionectriaceae Meruliaceae 20 42 150. 8.00e- 6 2.00e- 3 **
										35 RB5 Bionectriaceae Phanerochaetaceae 20 28 191 1.20e- 2 1.00e+ 0 ns
										36 RB5 Bionectriaceae Polyporaceae 20 233 1092 2.41e- 5 5.00e- 3 **
										37 RB5 Bionectriaceae Stereaceae 20 12 126 4.78e- 1 1.00e+ 0 ns
										38 RB5 Hypocreaceae Nectriaceae 15 97 562. 4.30e- 2 1.00e+ 0 ns
										39 RB5 Hypocreaceae Pleosporaceae 15 15 90 7.90e- 2 1.00e+ 0 ns
										40 RB5 Hypocreaceae Diatrypaceae 15 17 120 3.81e- 1 1.00e+ 0 ns
										41 RB5 Hypocreaceae Xylariaceae 15 58 368. 1.09e- 1 1.00e+ 0 ns
										42 RB5 Hypocreaceae Agaricaceae 15 92 548. 5.60e- 2 1.00e+ 0 ns
										43 RB5 Hypocreaceae Omphalotaceae 15 18 112. 1.11e- 1 1.00e+ 0 ns
										44 RB5 Hypocreaceae Pleurotaceae 15 13 30 1.94e- 4 3.70e- 2 *
										45 RB5 Hypocreaceae Psathyrellaceae 15 13 60 1.10e- 2 1.00e+ 0 ns
										46 RB5 Hypocreaceae Strophariaceae 15 18 82.5 8.00e- 3 1.00e+ 0 ns
										47 RB5 Hypocreaceae Gloeophyllaceae 15 20 75 2.00e- 3 3.40e- 1 ns
										48 RB5 Hypocreaceae Hymenochaetaceae 15 46 128. 6.85e- 5 1.30e- 2 *
										49 RB5 Hypocreaceae Fomitopsidaceae 15 42 172. 2.00e- 3 3.97e- 1 ns
										50 RB5 Hypocreaceae Ganodermataceae 15 38 158. 2.00e- 3 4.57e- 1 ns
										51 RB5 Hypocreaceae Meruliaceae 15 42 105 3.53e- 5 7.00e- 3 **
										52 RB5 Hypocreaceae Phanerochaetaceae 15 28 135 1.00e- 2 1.00e+ 0 ns
										53 RB5 Hypocreaceae Polyporaceae 15 233 765 9.58e- 5 1.80e- 2 *
										54 RB5 Hypocreaceae Stereaceae 15 12 90 NaN NaN ?
										55 RB5 Nectriaceae Pleosporaceae 97 15 774 5.89e- 1 1.00e+ 0 ns
										56 RB5 Nectriaceae Diatrypaceae 97 17 972 9.50e- 2 1.00e+ 0 ns
										57 RB5 Nectriaceae Xylariaceae 97 58 3054. 2.04e- 1 1.00e+ 0 ns
										58 RB5 Nectriaceae Agaricaceae 97 92 4588. 6.42e- 1 1.00e+ 0 ns
										59 RB5 Nectriaceae Omphalotaceae 97 18 938. 4.94e- 1 1.00e+ 0 ns
										60 RB5 Nectriaceae Pleurotaceae 97 13 336 5.88e- 4 1.11e- 1 ns
										61 RB5 Nectriaceae Psathyrellaceae 97 13 555 3.57e- 1 1.00e+ 0 ns
										62 RB5 Nectriaceae Strophariaceae 97 18 684. 5.80e- 2 1.00e+ 0 ns
										63 RB5 Nectriaceae Gloeophyllaceae 97 20 709 1.60e- 2 1.00e+ 0 ns
										64 RB5 Nectriaceae Hymenochaetaceae 97 46 1158. 5.92e- 8 1.12e- 5 ****
										65 RB5 Nectriaceae Fomitopsidaceae 97 42 1582. 9.00e- 3 1.00e+ 0 ns
										66 RB5 Nectriaceae Ganodermataceae 97 38 1434. 1.20e- 2 1.00e+ 0 ns
										67 RB5 Nectriaceae Meruliaceae 97 42 932 3.28e- 9 6.20e- 7 ****
										68 RB5 Nectriaceae Phanerochaetaceae 97 28 1121 6.80e- 2 1.00e+ 0 ns
										69 RB5 Nectriaceae Polyporaceae 97 233 6742 2.64e-10 4.99e- 8 ****
										70 RB5 Nectriaceae Stereaceae 97 12 714 6.90e- 2 1.00e+ 0 ns
										71 RB5 Pleosporaceae Diatrypaceae 15 17 146. 2.49e- 1 1.00e+ 0 ns
										72 RB5 Pleosporaceae Xylariaceae 15 58 448. 7.83e- 1 1.00e+ 0 ns
										73 RB5 Pleosporaceae Agaricaceae 15 92 663 7.36e- 1 1.00e+ 0 ns
										74 RB5 Pleosporaceae Omphalotaceae 15 18 138 8.93e- 1 1.00e+ 0 ns
										75 RB5 Pleosporaceae Pleurotaceae 15 13 40.5 4.00e- 3 6.97e- 1 ns
										76 RB5 Pleosporaceae Psathyrellaceae 15 13 76.5 2.33e- 1 1.00e+ 0 ns
										77 RB5 Pleosporaceae Strophariaceae 15 18 100. 1.30e- 1 1.00e+ 0 ns
										78 RB5 Pleosporaceae Gloeophyllaceae 15 20 96 3.80e- 2 1.00e+ 0 ns
										79 RB5 Pleosporaceae Hymenochaetaceae 15 46 159 8.60e- 4 1.63e- 1 ns
										80 RB5 Pleosporaceae Fomitopsidaceae 15 42 213 3.50e- 2 1.00e+ 0 ns
										81 RB5 Pleosporaceae Ganodermataceae 15 38 195 4.20e- 2 1.00e+ 0 ns
										82 RB5 Pleosporaceae Meruliaceae 15 42 129 3.35e- 4 6.30e- 2 ns
										83 RB5 Pleosporaceae Phanerochaetaceae 15 28 165 1.62e- 1 1.00e+ 0 ns
										84 RB5 Pleosporaceae Polyporaceae 15 233 940. 1.00e- 3 2.68e- 1 ns
										85 RB5 Pleosporaceae Stereaceae 15 12 108 1.17e- 1 1.00e+ 0 ns
										86 RB5 Diatrypaceae Xylariaceae 17 58 444. 2.94e- 1 1.00e+ 0 ns
										87 RB5 Diatrypaceae Agaricaceae 17 92 659 1.29e- 1 1.00e+ 0 ns
										88 RB5 Diatrypaceae Omphalotaceae 17 18 136 3.24e- 1 1.00e+ 0 ns
										89 RB5 Diatrypaceae Pleurotaceae 17 13 37.5 2.91e- 4 5.50e- 2 ns
										90 RB5 Diatrypaceae Psathyrellaceae 17 13 73.5 2.80e- 2 1.00e+ 0 ns
										91 RB5 Diatrypaceae Strophariaceae 17 18 99.5 1.70e- 2 1.00e+ 0 ns
										92 RB5 Diatrypaceae Gloeophyllaceae 17 20 92 3.00e- 3 6.41e- 1 ns
										93 RB5 Diatrypaceae Hymenochaetaceae 17 46 155 6.64e- 5 1.30e- 2 *
										94 RB5 Diatrypaceae Fomitopsidaceae 17 42 209 3.00e- 3 6.29e- 1 ns
										95 RB5 Diatrypaceae Ganodermataceae 17 38 191 4.00e- 3 7.54e- 1 ns
										96 RB5 Diatrypaceae Meruliaceae 17 42 127 2.94e- 5 6.00e- 3 **
										97 RB5 Diatrypaceae Phanerochaetaceae 17 28 163 2.00e- 2 1.00e+ 0 ns
										98 RB5 Diatrypaceae Polyporaceae 17 233 926. 8.91e- 5 1.70e- 2 *
										99 RB5 Diatrypaceae Stereaceae 17 12 108 4.41e- 1 1.00e+ 0 ns
										100 RB5 Xylariaceae Agaricaceae 58 92 2506. 3.60e- 1 1.00e+ 0 ns
										101 RB5 Xylariaceae Omphalotaceae 58 18 516. 9.23e- 1 1.00e+ 0 ns
										102 RB5 Xylariaceae Pleurotaceae 58 13 162. 2.80e- 5 5.00e- 3 **
										103 RB5 Xylariaceae Psathyrellaceae 58 13 292. 6.80e- 2 1.00e+ 0 ns
										104 RB5 Xylariaceae Strophariaceae 58 18 377 1.30e- 2 1.00e+ 0 ns
										105 RB5 Xylariaceae Gloeophyllaceae 58 20 368 1.00e- 3 2.44e- 1 ns
										106 RB5 Xylariaceae Hymenochaetaceae 58 46 610. 3.55e- 8 6.71e- 6 ****
										107 RB5 Xylariaceae Fomitopsidaceae 58 42 824. 5.15e- 4 9.70e- 2 ns
										108 RB5 Xylariaceae Ganodermataceae 58 38 752. 7.90e- 4 1.49e- 1 ns
										109 RB5 Xylariaceae Meruliaceae 58 42 494 4.71e- 9 8.90e- 7 ****
										110 RB5 Xylariaceae Phanerochaetaceae 58 28 618 1.40e- 2 1.00e+ 0 ns
										111 RB5 Xylariaceae Polyporaceae 58 233 3592. 1.99e- 9 3.76e- 7 ****
										112 RB5 Xylariaceae Stereaceae 58 12 402 1.52e- 1 1.00e+ 0 ns
										113 RB5 Agaricaceae Omphalotaceae 92 18 869 6.39e- 1 1.00e+ 0 ns
										114 RB5 Agaricaceae Pleurotaceae 92 13 298 1.76e- 4 3.30e- 2 *
										115 RB5 Agaricaceae Psathyrellaceae 92 13 508. 2.33e- 1 1.00e+ 0 ns
										116 RB5 Agaricaceae Strophariaceae 92 18 632. 3.40e- 2 1.00e+ 0 ns
										117 RB5 Agaricaceae Gloeophyllaceae 92 20 643 6.00e- 3 1.00e+ 0 ns
										118 RB5 Agaricaceae Hymenochaetaceae 92 46 1054 1.58e- 8 2.99e- 6 ****
										119 RB5 Agaricaceae Fomitopsidaceae 92 42 1432 3.00e- 3 4.78e- 1 ns
										120 RB5 Agaricaceae Ganodermataceae 92 38 1301 4.00e- 3 6.96e- 1 ns
										121 RB5 Agaricaceae Meruliaceae 92 42 844. 8.37e-10 1.58e- 7 ****
										122 RB5 Agaricaceae Phanerochaetaceae 92 28 1038 3.90e- 2 1.00e+ 0 ns
										123 RB5 Agaricaceae Polyporaceae 92 233 6138. 4.92e-11 9.30e- 9 ****
										124 RB5 Agaricaceae Stereaceae 92 12 666 8.60e- 2 1.00e+ 0 ns
										125 RB5 Omphalotaceae Pleurotaceae 18 13 51 3.00e- 3 5.14e- 1 ns
										126 RB5 Omphalotaceae Psathyrellaceae 18 13 91.5 1.92e- 1 1.00e+ 0 ns
										127 RB5 Omphalotaceae Strophariaceae 18 18 118. 8.40e- 2 1.00e+ 0 ns
										128 RB5 Omphalotaceae Gloeophyllaceae 18 20 116 2.80e- 2 1.00e+ 0 ns
										129 RB5 Omphalotaceae Hymenochaetaceae 18 46 192 3.47e- 4 6.60e- 2 ns
										130 RB5 Omphalotaceae Fomitopsidaceae 18 42 260 2.80e- 2 1.00e+ 0 ns
										131 RB5 Omphalotaceae Ganodermataceae 18 38 237 3.20e- 2 1.00e+ 0 ns
										132 RB5 Omphalotaceae Meruliaceae 18 42 156. 1.25e- 4 2.40e- 2 *
										133 RB5 Omphalotaceae Phanerochaetaceae 18 28 194 1.02e- 1 1.00e+ 0 ns
										134 RB5 Omphalotaceae Polyporaceae 18 233 1134. 5.33e- 4 1.01e- 1 ns
										135 RB5 Omphalotaceae Stereaceae 18 12 126 1.55e- 1 1.00e+ 0 ns
										136 RB5 Pleurotaceae Psathyrellaceae 13 13 118. 6.80e- 2 1.00e+ 0 ns
										137 RB5 Pleurotaceae Strophariaceae 13 18 138. 3.69e- 1 1.00e+ 0 ns
										138 RB5 Pleurotaceae Gloeophyllaceae 13 20 158 2.87e- 1 1.00e+ 0 ns
										139 RB5 Pleurotaceae Hymenochaetaceae 13 46 264 5.10e- 1 1.00e+ 0 ns
										140 RB5 Pleurotaceae Fomitopsidaceae 13 42 340 1.58e- 1 1.00e+ 0 ns
										141 RB5 Pleurotaceae Ganodermataceae 13 38 308 1.61e- 1 1.00e+ 0 ns
										142 RB5 Pleurotaceae Meruliaceae 13 42 217 2.52e- 1 1.00e+ 0 ns
										143 RB5 Pleurotaceae Phanerochaetaceae 13 28 225 1.93e- 1 1.00e+ 0 ns
										144 RB5 Pleurotaceae Polyporaceae 13 233 1480. 8.87e- 1 1.00e+ 0 ns
										145 RB5 Pleurotaceae Stereaceae 13 12 132 6.92e- 4 1.31e- 1 ns
										146 RB5 Psathyrellaceae Strophariaceae 13 18 104. 5.52e- 1 1.00e+ 0 ns
										147 RB5 Psathyrellaceae Gloeophyllaceae 13 20 108. 3.72e- 1 1.00e+ 0 ns
										148 RB5 Psathyrellaceae Hymenochaetaceae 13 46 174 1.60e- 2 1.00e+ 0 ns
										149 RB5 Psathyrellaceae Fomitopsidaceae 13 42 235 4.10e- 1 1.00e+ 0 ns
										150 RB5 Psathyrellaceae Ganodermataceae 13 38 214 4.35e- 1 1.00e+ 0 ns
										151 RB5 Psathyrellaceae Meruliaceae 13 42 139 5.00e- 3 1.00e+ 0 ns
										152 RB5 Psathyrellaceae Phanerochaetaceae 13 28 170 7.08e- 1 1.00e+ 0 ns
										153 RB5 Psathyrellaceae Polyporaceae 13 233 1009 3.20e- 2 1.00e+ 0 ns
										154 RB5 Psathyrellaceae Stereaceae 13 12 108 2.10e- 2 1.00e+ 0 ns
										155 RB5 Strophariaceae Gloeophyllaceae 18 20 179 9.87e- 1 1.00e+ 0 ns
										156 RB5 Strophariaceae Hymenochaetaceae 18 46 316. 1.19e- 1 1.00e+ 0 ns
										157 RB5 Strophariaceae Fomitopsidaceae 18 42 392. 8.02e- 1 1.00e+ 0 ns
										158 RB5 Strophariaceae Ganodermataceae 18 38 356. 8.00e- 1 1.00e+ 0 ns
										159 RB5 Strophariaceae Meruliaceae 18 42 271 6.80e- 2 1.00e+ 0 ns
										160 RB5 Strophariaceae Phanerochaetaceae 18 28 260 8.44e- 1 1.00e+ 0 ns
										161 RB5 Strophariaceae Polyporaceae 18 233 1776. 2.50e- 1 1.00e+ 0 ns
										162 RB5 Strophariaceae Stereaceae 18 12 150 1.80e- 2 1.00e+ 0 ns
										163 RB5 Gloeophyllaceae Hymenochaetaceae 20 46 327 5.20e- 2 1.00e+ 0 ns
										164 RB5 Gloeophyllaceae Fomitopsidaceae 20 42 437 7.86e- 1 1.00e+ 0 ns
										165 RB5 Gloeophyllaceae Ganodermataceae 20 38 396 7.82e- 1 1.00e+ 0 ns
										166 RB5 Gloeophyllaceae Meruliaceae 20 42 266. 1.60e- 2 1.00e+ 0 ns
										167 RB5 Gloeophyllaceae Phanerochaetaceae 20 28 295 7.34e- 1 1.00e+ 0 ns
										168 RB5 Gloeophyllaceae Polyporaceae 20 233 1870. 1.22e- 1 1.00e+ 0 ns
										169 RB5 Gloeophyllaceae Stereaceae 20 12 180 5.00e- 3 8.92e- 1 ns
										170 RB5 Hymenochaetaceae Fomitopsidaceae 46 42 1280 6.00e- 3 1.00e+ 0 ns
										171 RB5 Hymenochaetaceae Ganodermataceae 46 38 1158 7.00e- 3 1.00e+ 0 ns
										172 RB5 Hymenochaetaceae Meruliaceae 46 42 914 6.50e- 1 1.00e+ 0 ns
										173 RB5 Hymenochaetaceae Phanerochaetaceae 46 28 819 3.60e- 2 1.00e+ 0 ns
										174 RB5 Hymenochaetaceae Polyporaceae 46 233 5847 3.03e- 1 1.00e+ 0 ns
										175 RB5 Hymenochaetaceae Stereaceae 46 12 450 3.01e- 4 5.70e- 2 ns
										176 RB5 Fomitopsidaceae Ganodermataceae 42 38 798 1.00e+ 0 1.00e+ 0 ns
										177 RB5 Fomitopsidaceae Meruliaceae 42 42 521 6.67e- 4 1.26e- 1 ns
										178 RB5 Fomitopsidaceae Phanerochaetaceae 42 28 595 9.30e- 1 1.00e+ 0 ns
										179 RB5 Fomitopsidaceae Polyporaceae 42 233 3720 9.00e- 3 1.00e+ 0 ns
										180 RB5 Fomitopsidaceae Stereaceae 42 12 366 5.00e- 3 1.00e+ 0 ns
										181 RB5 Ganodermataceae Meruliaceae 38 42 474 1.00e- 3 1.91e- 1 ns
										182 RB5 Ganodermataceae Phanerochaetaceae 38 28 537 9.48e- 1 1.00e+ 0 ns
										183 RB5 Ganodermataceae Polyporaceae 38 233 3372 1.30e- 2 1.00e+ 0 ns
										184 RB5 Ganodermataceae Stereaceae 38 12 330 6.00e- 3 1.00e+ 0 ns
										185 RB5 Meruliaceae Phanerochaetaceae 42 28 773 1.80e- 2 1.00e+ 0 ns
										186 RB5 Meruliaceae Polyporaceae 42 233 5626. 1.03e- 1 1.00e+ 0 ns
										187 RB5 Meruliaceae Stereaceae 42 12 420 1.68e- 4 3.20e- 2 *
										188 RB5 Phanerochaetaceae Polyporaceae 28 233 2645 8.20e- 2 1.00e+ 0 ns
										189 RB5 Phanerochaetaceae Stereaceae 28 12 228 2.10e- 2 1.00e+ 0 ns
										190 RB5 Polyporaceae Stereaceae 233 12 2184 4.60e- 4 8.70e- 2 ns
										>

## Sheet: BB41
# A tibble: 20 x 11										# A tibble: 190 x 9
Family variable n min max median iqr mean sd se ci										.y. group1 group2 n1 n2 statistic p p.adj p.adj.signif
<fct> <chr> <dbl> <dbl> <dbl> <dbl> <dbl> <dbl> <dbl> <dbl> <dbl>										<chr> <chr> <chr> <int> <int> <dbl> <dbl> <dbl> <chr>
1 Aspergillaceae BB41 63 0 4 0 0 0.143 0.715 0.09 0.18										1 BB41 Aspergillaceae Bionectriaceae 63 20 565 1.26e- 1 1.00e+0 ns
2 Bionectriaceae BB41 20 0 4 0 0 0.5 1.28 0.286 0.598										2 BB41 Aspergillaceae Hypocreaceae 63 15 495 4.02e- 1 1.00e+0 ns
3 Hypocreaceae BB41 15 0 0 0 0 0 0 0 0										3 BB41 Aspergillaceae Nectriaceae 63 97 1848. 1.20e- 7 2.21e-5 ****
4 Nectriaceae BB41 97 0 4 0 3 1.34 1.72 0.175 0.347										4 BB41 Aspergillaceae Pleosporaceae 63 15 463 7.65e- 1 1.00e+0 ns
5 Pleosporaceae BB41 15 0 4 0 0 0.267 1.03 0.267 0.572										5 BB41 Aspergillaceae Diatrypaceae 63 17 500. 3.20e- 1 1.00e+0 ns
6 Diatrypaceae BB41 17 0 3 0 0 0.235 0.752 0.182 0.387										6 BB41 Aspergillaceae Xylariaceae 63 58 1075 2.62e- 7 4.82e-5 ****
7 Xylariaceae BB41 58 0 4 0 3 1.19 1.47 0.193 0.386										7 BB41 Aspergillaceae Agaricaceae 63 92 2942. 6.31e- 1 1.00e+0 ns
8 Agaricaceae BB41 92 0 4 0 0 0.076 0.474 0.049 0.098										8 BB41 Aspergillaceae Omphalotaceae 63 18 533 3.62e- 1 1.00e+0 ns
9 Omphalotaceae BB41 18 0 1 0 0 0.111 0.323 0.076 0.161										9 BB41 Aspergillaceae Pleurotaceae 63 13 429 4.37e- 1 1.00e+0 ns
10 Pleurotaceae BB41 13 0 0 0 0 0 0 0 0										10 BB41 Aspergillaceae Psathyrellaceae 63 13 429 4.37e- 1 1.00e+0 ns
11 Psathyrellaceae BB41 13 0 0 0 0 0 0 0 0										11 BB41 Aspergillaceae Strophariaceae 63 18 594 3.58e- 1 1.00e+0 ns
12 Strophariaceae BB41 18 0 0 0 0 0 0 0 0										12 BB41 Aspergillaceae Gloeophyllaceae 63 20 312. 1.98e- 7 3.64e-5 ****
13 Gloeophyllaceae BB41 20 0 4 2 4 1.95 1.93 0.432 0.904										13 BB41 Aspergillaceae Hymenochaetaceae 63 46 1087 4.36e- 4 8.00e-2 ns
14 Hymenochaetaceae BB41 46 0 4 0 1 0.5 0.983 0.145 0.292										14 BB41 Aspergillaceae Fomitopsidaceae 63 42 790. 9.16e- 7 1.69e-4 ***
15 Fomitopsidaceae BB41 42 0 4 0 2.75 1.29 1.69 0.26 0.525										15 BB41 Aspergillaceae Ganodermataceae 63 38 1162. 5.49e- 1 1.00e+0 ns
16 Ganodermataceae BB41 38 0 3 0 0 0.158 0.594 0.096 0.195										16 BB41 Aspergillaceae Meruliaceae 63 42 1044 2.00e- 3 3.75e-1 ns
17 Meruliaceae BB41 42 0 4 0 0.75 0.714 1.31 0.202 0.409										17 BB41 Aspergillaceae Phanerochaetaceae 63 28 862. 6.79e- 1 1.00e+0 ns
18 Phanerochaetaceae BB41 28 0 3 0 0 0.143 0.591 0.112 0.229										18 BB41 Aspergillaceae Polyporaceae 63 233 6290. 7.00e- 3 1.00e+0 ns
19 Polyporaceae BB41 233 0 4 0 0 0.519 1.15 0.076 0.149										19 BB41 Aspergillaceae Stereaceae 63 12 334. 1.51e- 1 1.00e+0 ns
20 Stereaceae BB41 12 0 2 0 0 0.25 0.622 0.179 0.395										20 BB41 Bionectriaceae Hypocreaceae 20 15 172. 1.31e- 1 1.00e+0 ns
										21 BB41 Bionectriaceae Nectriaceae 20 97 694. 2.30e- 2 1.00e+0 ns
										22 BB41 Bionectriaceae Pleosporaceae 20 15 162 4.87e- 1 1.00e+0 ns
										23 BB41 Bionectriaceae Diatrypaceae 20 17 178. 7.20e- 1 1.00e+0 ns
										24 BB41 Bionectriaceae Xylariaceae 20 58 414 3.00e- 2 1.00e+0 ns
										25 BB41 Bionectriaceae Agaricaceae 20 92 1030 3.30e- 2 1.00e+0 ns
										26 BB41 Bionectriaceae Omphalotaceae 20 18 190 6.36e- 1 1.00e+0 ns
										27 BB41 Bionectriaceae Pleurotaceae 20 13 150. 1.60e- 1 1.00e+0 ns
										28 BB41 Bionectriaceae Psathyrellaceae 20 13 150. 1.60e- 1 1.00e+0 ns
										29 BB41 Bionectriaceae Strophariaceae 20 18 207 9.80e- 2 1.00e+0 ns
										30 BB41 Bionectriaceae Gloeophyllaceae 20 20 118. 9.00e- 3 1.00e+0 ns
										31 BB41 Bionectriaceae Hymenochaetaceae 20 46 404. 3.17e- 1 1.00e+0 ns
										32 BB41 Bionectriaceae Fomitopsidaceae 20 42 299 3.30e- 2 1.00e+0 ns
										33 BB41 Bionectriaceae Ganodermataceae 20 38 410 3.61e- 1 1.00e+0 ns
										34 BB41 Bionectriaceae Meruliaceae 20 42 379 4.04e- 1 1.00e+0 ns
										35 BB41 Bionectriaceae Phanerochaetaceae 20 28 304 3.54e- 1 1.00e+0 ns
										36 BB41 Bionectriaceae Polyporaceae 20 233 2254. 7.27e- 1 1.00e+0 ns
										37 BB41 Bionectriaceae Stereaceae 20 12 120. 1.00e+ 0 1.00e+0 ns
										38 BB41 Hypocreaceae Nectriaceae 15 97 405 2.00e- 3 2.85e-1 ns
										39 BB41 Hypocreaceae Pleosporaceae 15 15 105 3.51e- 1 1.00e+0 ns
										40 BB41 Hypocreaceae Diatrypaceae 15 17 112. 1.92e- 1 1.00e+0 ns
										41 BB41 Hypocreaceae Xylariaceae 15 58 232. 1.00e- 3 2.58e-1 ns
										42 BB41 Hypocreaceae Agaricaceae 15 92 668. 4.90e- 1 1.00e+0 ns
										43 BB41 Hypocreaceae Omphalotaceae 15 18 120 2.05e- 1 1.00e+0 ns
										44 BB41 Hypocreaceae Pleurotaceae 15 13 97.5 NaN NaN ?
										45 BB41 Hypocreaceae Psathyrellaceae 15 13 97.5 NaN NaN ?
										46 BB41 Hypocreaceae Strophariaceae 15 18 135 NaN NaN ?
										47 BB41 Hypocreaceae Gloeophyllaceae 15 20 67.5 8.10e- 4 1.49e-1 ns
										48 BB41 Hypocreaceae Hymenochaetaceae 15 46 240 1.70e- 2 1.00e+0 ns
										49 BB41 Hypocreaceae Fomitopsidaceae 15 42 172. 2.00e- 3 3.79e-1 ns
										50 BB41 Hypocreaceae Ganodermataceae 15 38 262. 2.78e- 1 1.00e+0 ns
										51 BB41 Hypocreaceae Meruliaceae 15 42 232. 3.10e- 2 1.00e+0 ns
										52 BB41 Hypocreaceae Phanerochaetaceae 15 28 195 3.11e- 1 1.00e+0 ns
										53 BB41 Hypocreaceae Polyporaceae 15 233 1410 6.20e- 2 1.00e+0 ns
										54 BB41 Hypocreaceae Stereaceae 15 12 75 1.19e- 1 1.00e+0 ns
										55 BB41 Nectriaceae Pleosporaceae 97 15 992 1.00e- 2 1.00e+0 ns
										56 BB41 Nectriaceae Diatrypaceae 97 17 1115 8.00e- 3 1.00e+0 ns
										57 BB41 Nectriaceae Xylariaceae 97 58 2910 6.95e- 1 1.00e+0 ns
										58 BB41 Nectriaceae Agaricaceae 97 92 6312 5.77e-11 1.06e-8 ****
										59 BB41 Nectriaceae Omphalotaceae 97 18 1197 4.00e- 3 8.10e-1 ns
										60 BB41 Nectriaceae Pleurotaceae 97 13 910 3.00e- 3 5.70e-1 ns
										61 BB41 Nectriaceae Psathyrellaceae 97 13 910 3.00e- 3 5.70e-1 ns
										62 BB41 Nectriaceae Strophariaceae 97 18 1260 5.67e- 4 1.04e-1 ns
										63 BB41 Nectriaceae Gloeophyllaceae 97 20 818. 2.25e- 1 1.00e+0 ns
										64 BB41 Nectriaceae Hymenochaetaceae 97 46 2707 2.00e- 2 1.00e+0 ns
										65 BB41 Nectriaceae Fomitopsidaceae 97 42 2044. 9.76e- 1 1.00e+0 ns
										66 BB41 Nectriaceae Ganodermataceae 97 38 2546. 4.32e- 5 8.00e-3 **
										67 BB41 Nectriaceae Meruliaceae 97 42 2462. 2.60e- 2 1.00e+0 ns
										68 BB41 Nectriaceae Phanerochaetaceae 97 28 1885 2.64e- 4 4.90e-2 *
										69 BB41 Nectriaceae Polyporaceae 97 233 14355 6.45e- 7 1.19e-4 ***
										70 BB41 Nectriaceae Stereaceae 97 12 770 4.10e- 2 1.00e+0 ns
										71 BB41 Pleosporaceae Diatrypaceae 15 17 122 7.09e- 1 1.00e+0 ns
										72 BB41 Pleosporaceae Xylariaceae 15 58 272. 1.10e- 2 1.00e+0 ns
										73 BB41 Pleosporaceae Agaricaceae 15 92 714. 5.12e- 1 1.00e+0 ns
										74 BB41 Pleosporaceae Omphalotaceae 15 18 130 7.44e- 1 1.00e+0 ns
										75 BB41 Pleosporaceae Pleurotaceae 15 13 104 3.90e- 1 1.00e+0 ns
										76 BB41 Pleosporaceae Psathyrellaceae 15 13 104 3.90e- 1 1.00e+0 ns
										77 BB41 Pleosporaceae Strophariaceae 15 18 144 3.01e- 1 1.00e+0 ns
										78 BB41 Pleosporaceae Gloeophyllaceae 15 20 79 5.00e- 3 9.13e-1 ns
										79 BB41 Pleosporaceae Hymenochaetaceae 15 46 269 9.30e- 2 1.00e+0 ns
										80 BB41 Pleosporaceae Fomitopsidaceae 15 42 198 1.30e- 2 1.00e+0 ns
										81 BB41 Pleosporaceae Ganodermataceae 15 38 283 9.48e- 1 1.00e+0 ns
										82 BB41 Pleosporaceae Meruliaceae 15 42 258 1.50e- 1 1.00e+0 ns
										83 BB41 Pleosporaceae Phanerochaetaceae 15 28 210 1.00e+ 0 1.00e+0 ns
										84 BB41 Pleosporaceae Polyporaceae 15 233 1544. 2.67e- 1 1.00e+0 ns
										85 BB41 Pleosporaceae Stereaceae 15 12 82 5.03e- 1 1.00e+0 ns
										86 BB41 Diatrypaceae Xylariaceae 17 58 314 1.00e- 2 1.00e+0 ns
										87 BB41 Diatrypaceae Agaricaceae 17 92 848 1.31e- 1 1.00e+0 ns
										88 BB41 Diatrypaceae Omphalotaceae 17 18 155 9.29e- 1 1.00e+0 ns
										89 BB41 Diatrypaceae Pleurotaceae 17 13 124. 2.26e- 1 1.00e+0 ns
										90 BB41 Diatrypaceae Psathyrellaceae 17 13 124. 2.26e- 1 1.00e+0 ns
										91 BB41 Diatrypaceae Strophariaceae 17 18 171 1.51e- 1 1.00e+0 ns
										92 BB41 Diatrypaceae Gloeophyllaceae 17 20 88 3.00e- 3 6.16e-1 ns
										93 BB41 Diatrypaceae Hymenochaetaceae 17 46 320. 1.55e- 1 1.00e+0 ns
										94 BB41 Diatrypaceae Fomitopsidaceae 17 42 230. 1.30e- 2 1.00e+0 ns
										95 BB41 Diatrypaceae Ganodermataceae 17 38 336. 6.61e- 1 1.00e+0 ns
										96 BB41 Diatrypaceae Meruliaceae 17 42 302. 2.04e- 1 1.00e+0 ns
										97 BB41 Diatrypaceae Phanerochaetaceae 17 28 249 6.18e- 1 1.00e+0 ns
										98 BB41 Diatrypaceae Polyporaceae 17 233 1816. 4.01e- 1 1.00e+0 ns
										99 BB41 Diatrypaceae Stereaceae 17 12 97.5 7.68e- 1 1.00e+0 ns
										100 BB41 Xylariaceae Agaricaceae 58 92 3828. 1.49e-10 2.74e-8 ****
										101 BB41 Xylariaceae Omphalotaceae 58 18 728 4.00e- 3 7.27e-1 ns
										102 BB41 Xylariaceae Pleurotaceae 58 13 552. 3.00e- 3 5.13e-1 ns
										103 BB41 Xylariaceae Psathyrellaceae 58 13 552. 3.00e- 3 5.13e-1 ns
										104 BB41 Xylariaceae Strophariaceae 58 18 765 5.16e- 4 9.50e-2 ns
										105 BB41 Xylariaceae Gloeophyllaceae 58 20 448. 1.02e- 1 1.00e+0 ns
										106 BB41 Xylariaceae Hymenochaetaceae 58 46 1634 2.60e- 2 1.00e+0 ns
										107 BB41 Xylariaceae Fomitopsidaceae 58 42 1188. 8.25e- 1 1.00e+0 ns
										108 BB41 Xylariaceae Ganodermataceae 58 38 1540. 6.28e- 5 1.20e-2 *
										109 BB41 Xylariaceae Meruliaceae 58 42 1452 6.10e- 2 1.00e+0 ns
										110 BB41 Xylariaceae Phanerochaetaceae 58 28 1140. 3.33e- 4 6.10e-2 ns
										111 BB41 Xylariaceae Polyporaceae 58 233 8552 3.51e- 5 6.00e-3 **
										112 BB41 Xylariaceae Stereaceae 58 12 468. 3.70e- 2 1.00e+0 ns
										113 BB41 Agaricaceae Omphalotaceae 92 18 765 1.62e- 1 1.00e+0 ns
										114 BB41 Agaricaceae Pleurotaceae 92 13 618. 5.22e- 1 1.00e+0 ns
										115 BB41 Agaricaceae Psathyrellaceae 92 13 618. 5.22e- 1 1.00e+0 ns
										116 BB41 Agaricaceae Strophariaceae 92 18 855 4.48e- 1 1.00e+0 ns
										117 BB41 Agaricaceae Gloeophyllaceae 92 20 436 1.57e-10 2.89e-8 ****
										118 BB41 Agaricaceae Hymenochaetaceae 92 46 1548. 7.14e- 6 1.00e-3 **
										119 BB41 Agaricaceae Fomitopsidaceae 92 42 1116. 1.26e- 9 2.32e-7 ****
										120 BB41 Agaricaceae Ganodermataceae 92 38 1668. 2.60e- 1 1.00e+0 ns
										121 BB41 Agaricaceae Meruliaceae 92 42 1486 5.68e- 5 1.00e-2 *
										122 BB41 Agaricaceae Phanerochaetaceae 92 28 1238. 3.80e- 1 1.00e+0 ns
										123 BB41 Agaricaceae Polyporaceae 92 233 8986. 2.36e- 4 4.30e-2 *
										124 BB41 Agaricaceae Stereaceae 92 12 479 4.70e- 2 1.00e+0 ns
										125 BB41 Omphalotaceae Pleurotaceae 18 13 130 2.40e- 1 1.00e+0 ns
										126 BB41 Omphalotaceae Psathyrellaceae 18 13 130 2.40e- 1 1.00e+0 ns
										127 BB41 Omphalotaceae Strophariaceae 18 18 180 1.63e- 1 1.00e+0 ns
										128 BB41 Omphalotaceae Gloeophyllaceae 18 20 91 2.00e- 3 3.81e-1 ns
										129 BB41 Omphalotaceae Hymenochaetaceae 18 46 330 9.90e- 2 1.00e+0 ns
										130 BB41 Omphalotaceae Fomitopsidaceae 18 42 235 7.00e- 3 1.00e+0 ns
										131 BB41 Omphalotaceae Ganodermataceae 18 38 351 7.63e- 1 1.00e+0 ns
										132 BB41 Omphalotaceae Meruliaceae 18 42 312 1.42e- 1 1.00e+0 ns
										133 BB41 Omphalotaceae Phanerochaetaceae 18 28 261 6.95e- 1 1.00e+0 ns
										134 BB41 Omphalotaceae Polyporaceae 18 233 1889 3.04e- 1 1.00e+0 ns
										135 BB41 Omphalotaceae Stereaceae 18 12 101 6.41e- 1 1.00e+0 ns
										136 BB41 Pleurotaceae Psathyrellaceae 13 13 84.5 NaN NaN ?
										137 BB41 Pleurotaceae Strophariaceae 13 18 117 NaN NaN ?
										138 BB41 Pleurotaceae Gloeophyllaceae 13 20 58.5 2.00e- 3 3.02e-1 ns
										139 BB41 Pleurotaceae Hymenochaetaceae 13 46 208 2.60e- 2 1.00e+0 ns
										140 BB41 Pleurotaceae Fomitopsidaceae 13 42 150. 4.00e- 3 7.18e-1 ns
										141 BB41 Pleurotaceae Ganodermataceae 13 38 228. 3.14e- 1 1.00e+0 ns
										142 BB41 Pleurotaceae Meruliaceae 13 42 202. 4.40e- 2 1.00e+0 ns
										143 BB41 Pleurotaceae Phanerochaetaceae 13 28 169 3.48e- 1 1.00e+0 ns
										144 BB41 Pleurotaceae Polyporaceae 13 233 1222 8.20e- 2 1.00e+0 ns
										145 BB41 Pleurotaceae Stereaceae 13 12 65 1.49e- 1 1.00e+0 ns
										146 BB41 Psathyrellaceae Strophariaceae 13 18 117 NaN NaN ?
										147 BB41 Psathyrellaceae Gloeophyllaceae 13 20 58.5 2.00e- 3 3.02e-1 ns
										148 BB41 Psathyrellaceae Hymenochaetaceae 13 46 208 2.60e- 2 1.00e+0 ns
										149 BB41 Psathyrellaceae Fomitopsidaceae 13 42 150. 4.00e- 3 7.18e-1 ns
										150 BB41 Psathyrellaceae Ganodermataceae 13 38 228. 3.14e- 1 1.00e+0 ns
										151 BB41 Psathyrellaceae Meruliaceae 13 42 202. 4.40e- 2 1.00e+0 ns
										152 BB41 Psathyrellaceae Phanerochaetaceae 13 28 169 3.48e- 1 1.00e+0 ns
										153 BB41 Psathyrellaceae Polyporaceae 13 233 1222 8.20e- 2 1.00e+0 ns
										154 BB41 Psathyrellaceae Stereaceae 13 12 65 1.49e- 1 1.00e+0 ns
										155 BB41 Strophariaceae Gloeophyllaceae 18 20 81 2.93e- 4 5.40e-2 ns
										156 BB41 Strophariaceae Hymenochaetaceae 18 46 288 9.00e- 3 1.00e+0 ns
										157 BB41 Strophariaceae Fomitopsidaceae 18 42 207 8.21e- 4 1.51e-1 ns
										158 BB41 Strophariaceae Ganodermataceae 18 38 315 2.34e- 1 1.00e+0 ns
										159 BB41 Strophariaceae Meruliaceae 18 42 279 1.80e- 2 1.00e+0 ns
										160 BB41 Strophariaceae Phanerochaetaceae 18 28 234 2.65e- 1 1.00e+0 ns
										161 BB41 Strophariaceae Polyporaceae 18 233 1692 4.10e- 2 1.00e+0 ns
										162 BB41 Strophariaceae Stereaceae 18 12 90 8.70e- 2 1.00e+0 ns
										163 BB41 Gloeophyllaceae Hymenochaetaceae 20 46 628 7.00e- 3 1.00e+0 ns
										164 BB41 Gloeophyllaceae Fomitopsidaceae 20 42 488 2.67e- 1 1.00e+0 ns
										165 BB41 Gloeophyllaceae Ganodermataceae 20 38 572 2.87e- 5 5.00e-3 **
										166 BB41 Gloeophyllaceae Meruliaceae 20 42 574. 7.00e- 3 1.00e+0 ns
										167 BB41 Gloeophyllaceae Phanerochaetaceae 20 28 422. 1.39e- 4 2.60e-2 *
										168 BB41 Gloeophyllaceae Polyporaceae 20 233 3292. 2.44e- 5 4.00e-3 **
										169 BB41 Gloeophyllaceae Stereaceae 20 12 176. 1.50e- 2 1.00e+0 ns
										170 BB41 Hymenochaetaceae Fomitopsidaceae 46 42 758 4.50e- 2 1.00e+0 ns
										171 BB41 Hymenochaetaceae Ganodermataceae 46 38 1065 1.50e- 2 1.00e+0 ns
										172 BB41 Hymenochaetaceae Meruliaceae 46 42 968. 9.83e- 1 1.00e+0 ns
										173 BB41 Hymenochaetaceae Phanerochaetaceae 46 28 792. 2.20e- 2 1.00e+0 ns
										174 BB41 Hymenochaetaceae Polyporaceae 46 233 5802. 2.14e- 1 1.00e+0 ns
										175 BB41 Hymenochaetaceae Stereaceae 46 12 312. 3.78e- 1 1.00e+0 ns
										176 BB41 Fomitopsidaceae Ganodermataceae 42 38 1107 1.53e- 4 2.80e-2 *
										177 BB41 Fomitopsidaceae Meruliaceae 42 42 1064 5.70e- 2 1.00e+0 ns
										178 BB41 Fomitopsidaceae Phanerochaetaceae 42 28 820 5.97e- 4 1.10e-1 ns
										179 BB41 Fomitopsidaceae Polyporaceae 42 233 6221 1.55e- 4 2.90e-2 *
										180 BB41 Fomitopsidaceae Stereaceae 42 12 334 5.20e- 2 1.00e+0 ns
										181 BB41 Ganodermataceae Meruliaceae 38 42 645 2.60e- 2 1.00e+0 ns
										182 BB41 Ganodermataceae Phanerochaetaceae 38 28 536 9.21e- 1 1.00e+0 ns
										183 BB41 Ganodermataceae Polyporaceae 38 233 3895 7.40e- 2 1.00e+0 ns
										184 BB41 Ganodermataceae Stereaceae 38 12 209 4.19e- 1 1.00e+0 ns
										185 BB41 Meruliaceae Phanerochaetaceae 42 28 704 4.10e- 2 1.00e+0 ns
										186 BB41 Meruliaceae Polyporaceae 42 233 5234. 3.08e- 1 1.00e+0 ns
										187 BB41 Meruliaceae Stereaceae 42 12 284. 3.89e- 1 1.00e+0 ns
										188 BB41 Phanerochaetaceae Polyporaceae 28 233 2850. 1.03e- 1 1.00e+0 ns
										189 BB41 Phanerochaetaceae Stereaceae 28 12 152. 3.95e- 1 1.00e+0 ns
										190 BB41 Polyporaceae Stereaceae 233 12 1464 6.90e- 1 1.00e+0 ns

## Sheet: IMP
# A tibble: 20 x 11										# A tibble: 190 x 9
Family variable n min max median iqr mean sd se ci										.y. group1 group2 n1 n2 statistic p p.adj p.adj.signif
<fct> <chr> <dbl> <dbl> <dbl> <dbl> <dbl> <dbl> <dbl> <dbl> <dbl>										<chr> <chr> <chr> <int> <int> <dbl> <dbl> <dbl> <chr>
1 Aspergillaceae IMP 63 0 4 4 4 2.16 2.01 0.253 0.506										1 IMP Aspergillaceae Bionectriaceae 63 20 750. 1.43e- 1 1.00e+ 0 ns
2 Bionectriaceae IMP 20 0 4 0 4 1.4 1.96 0.438 0.916										2 IMP Aspergillaceae Hypocreaceae 63 15 538. 3.37e- 1 1.00e+ 0 ns
3 Hypocreaceae IMP 15 0 4 0 4 1.6 2.03 0.524 1.12										3 IMP Aspergillaceae Nectriaceae 63 97 3318. 2.90e- 1 1.00e+ 0 ns
4 Nectriaceae IMP 97 0 4 0 4 1.81 2.00 0.203 0.403										4 IMP Aspergillaceae Pleosporaceae 63 15 286. 5.00e- 3 9.94e- 1 ns
5 Pleosporaceae IMP 15 0 4 4 0 3.73 1.03 0.267 0.572										5 IMP Aspergillaceae Diatrypaceae 63 17 793 4.36e- 4 8.20e- 2 ns
6 Diatrypaceae IMP 17 0 4 0 0 0.235 0.97 0.235 0.499										6 IMP Aspergillaceae Xylariaceae 63 58 2561 3.93e- 6 7.43e- 4 ***
7 Xylariaceae IMP 58 0 4 0 0 0.552 1.39 0.183 0.366										7 IMP Aspergillaceae Agaricaceae 63 92 3738. 2.53e- 4 4.80e- 2 *
8 Agaricaceae IMP 92 0 4 0 1 1 1.74 0.182 0.361										8 IMP Aspergillaceae Omphalotaceae 63 18 842. 2.86e- 4 5.40e- 2 ns
9 Omphalotaceae IMP 18 0 4 0 0 0.222 0.943 0.222 0.469										9 IMP Aspergillaceae Pleurotaceae 63 13 630. 4.13e- 4 7.80e- 2 ns
10 Pleurotaceae IMP 13 0 0 0 0 0 0 0 0										10 IMP Aspergillaceae Psathyrellaceae 63 13 599 3.00e- 3 4.78e- 1 ns
11 Psathyrellaceae IMP 13 0 4 0 0 0.308 1.11 0.308 0.67										11 IMP Aspergillaceae Strophariaceae 63 18 716. 5.20e- 2 1.00e+ 0 ns
12 Strophariaceae IMP 18 0 4 0 3 1.11 1.84 0.435 0.917										12 IMP Aspergillaceae Gloeophyllaceae 63 20 750. 1.43e- 1 1.00e+ 0 ns
13 Gloeophyllaceae IMP 20 0 4 0 4 1.4 1.96 0.438 0.916										13 IMP Aspergillaceae Hymenochaetaceae 63 46 1664 1.28e- 1 1.00e+ 0 ns
14 Hymenochaetaceae IMP 46 0 4 0 4 1.56 1.97 0.291 0.586										14 IMP Aspergillaceae Fomitopsidaceae 63 42 1880. 1.39e- 5 3.00e- 3 **
15 Fomitopsidaceae IMP 42 0 4 0 0 0.476 1.31 0.202 0.409										15 IMP Aspergillaceae Ganodermataceae 63 38 1780 8.56e- 7 1.62e- 4 ***
16 Ganodermataceae IMP 38 0 4 0 0 0.211 0.905 0.147 0.298										16 IMP Aspergillaceae Meruliaceae 63 42 1942. 9.92e- 7 1.87e- 4 ***
17 Meruliaceae IMP 42 0 4 0 0 0.286 1.04 0.161 0.325										17 IMP Aspergillaceae Phanerochaetaceae 63 28 1358 1.06e- 6 2.00e- 4 ***
18 Phanerochaetaceae IMP 28 0 0 0 0 0 0 0 0										18 IMP Aspergillaceae Polyporaceae 63 233 10639 4.50e-16 8.50e-14 ****
19 Polyporaceae IMP 233 0 4 0 0 0.361 1.15 0.075 0.148										19 IMP Aspergillaceae Stereaceae 63 12 550. 4.00e- 3 7.60e- 1 ns
20 Stereaceae IMP 12 0 4 0 0 0.333 1.16 0.333 0.734										20 IMP Bionectriaceae Hypocreaceae 20 15 142. 7.80e- 1 1.00e+ 0 ns
										21 IMP Bionectriaceae Nectriaceae 20 97 870. 3.99e- 1 1.00e+ 0 ns
										22 IMP Bionectriaceae Pleosporaceae 20 15 62.5 6.35e- 4 1.20e- 1 ns
										23 IMP Bionectriaceae Diatrypaceae 20 17 220. 3.60e- 2 1.00e+ 0 ns
										24 IMP Bionectriaceae Xylariaceae 20 58 703 4.00e- 2 1.00e+ 0 ns
										25 IMP Bionectriaceae Agaricaceae 20 92 1012 3.65e- 1 1.00e+ 0 ns
										26 IMP Bionectriaceae Omphalotaceae 20 18 233 3.00e- 2 1.00e+ 0 ns
										27 IMP Bionectriaceae Pleurotaceae 20 13 176. 1.90e- 2 1.00e+ 0 ns
										28 IMP Bionectriaceae Psathyrellaceae 20 13 166. 8.20e- 2 1.00e+ 0 ns
										29 IMP Bionectriaceae Strophariaceae 20 18 193 6.50e- 1 1.00e+ 0 ns
										30 IMP Bionectriaceae Gloeophyllaceae 20 20 200 1.00e+ 0 1.00e+ 0 ns
										31 IMP Bionectriaceae Hymenochaetaceae 20 46 441 7.59e- 1 1.00e+ 0 ns
										32 IMP Bionectriaceae Fomitopsidaceae 20 42 517 3.40e- 2 1.00e+ 0 ns
										33 IMP Bionectriaceae Ganodermataceae 20 38 493 3.00e- 3 6.31e- 1 ns
										34 IMP Bionectriaceae Meruliaceae 20 42 537 6.00e- 3 1.00e+ 0 ns
										35 IMP Bionectriaceae Phanerochaetaceae 20 28 378 8.54e- 4 1.61e- 1 ns
										36 IMP Bionectriaceae Polyporaceae 20 233 2936. 3.93e- 4 7.40e- 2 ns
										37 IMP Bionectriaceae Stereaceae 20 12 152 1.02e- 1 1.00e+ 0 ns
										38 IMP Hypocreaceae Nectriaceae 15 97 688. 7.02e- 1 1.00e+ 0 ns
										39 IMP Hypocreaceae Pleosporaceae 15 15 52.5 3.00e- 3 4.76e- 1 ns
										40 IMP Hypocreaceae Diatrypaceae 15 17 171 2.30e- 2 1.00e+ 0 ns
										41 IMP Hypocreaceae Xylariaceae 15 58 549 2.30e- 2 1.00e+ 0 ns
										42 IMP Hypocreaceae Agaricaceae 15 92 794. 2.30e- 1 1.00e+ 0 ns
										43 IMP Hypocreaceae Omphalotaceae 15 18 182. 1.90e- 2 1.00e+ 0 ns
										44 IMP Hypocreaceae Pleurotaceae 15 13 136. 1.30e- 2 1.00e+ 0 ns
										45 IMP Hypocreaceae Psathyrellaceae 15 13 129 5.70e- 2 1.00e+ 0 ns
										46 IMP Hypocreaceae Strophariaceae 15 18 152. 4.79e- 1 1.00e+ 0 ns
										47 IMP Hypocreaceae Gloeophyllaceae 15 20 158. 7.80e- 1 1.00e+ 0 ns
										48 IMP Hypocreaceae Hymenochaetaceae 15 46 348 9.61e- 1 1.00e+ 0 ns
										49 IMP Hypocreaceae Fomitopsidaceae 15 42 404. 2.00e- 2 1.00e+ 0 ns
										50 IMP Hypocreaceae Ganodermataceae 15 38 384 2.00e- 3 3.23e- 1 ns
										51 IMP Hypocreaceae Meruliaceae 15 42 418. 3.00e- 3 5.92e- 1 ns
										52 IMP Hypocreaceae Phanerochaetaceae 15 28 294 3.94e- 4 7.40e- 2 ns
										53 IMP Hypocreaceae Polyporaceae 15 233 2289 1.96e- 4 3.70e- 2 *
										54 IMP Hypocreaceae Stereaceae 15 12 118. 7.20e- 2 1.00e+ 0 ns
										55 IMP Nectriaceae Pleosporaceae 97 15 378. 5.82e- 4 1.10e- 1 ns
										56 IMP Nectriaceae Diatrypaceae 97 17 1150 2.00e- 3 4.27e- 1 ns
										57 IMP Nectriaceae Xylariaceae 97 58 3701 6.00e- 5 1.10e- 2 *
										58 IMP Nectriaceae Agaricaceae 97 92 5370. 4.00e- 3 6.71e- 1 ns
										59 IMP Nectriaceae Omphalotaceae 97 18 1220. 2.00e- 3 2.99e- 1 ns
										60 IMP Nectriaceae Pleurotaceae 97 13 916. 2.00e- 3 3.48e- 1 ns
										61 IMP Nectriaceae Psathyrellaceae 97 13 868 1.00e- 2 1.00e+ 0 ns
										62 IMP Nectriaceae Strophariaceae 97 18 1026. 1.69e- 1 1.00e+ 0 ns
										63 IMP Nectriaceae Gloeophyllaceae 97 20 1070. 3.99e- 1 1.00e+ 0 ns
										64 IMP Nectriaceae Hymenochaetaceae 97 46 2370 4.86e- 1 1.00e+ 0 ns
										65 IMP Nectriaceae Fomitopsidaceae 97 42 2718. 1.60e- 4 3.00e- 2 *
										66 IMP Nectriaceae Ganodermataceae 97 38 2582 1.08e- 5 2.00e- 3 **
										67 IMP Nectriaceae Meruliaceae 97 42 2816. 1.33e- 5 3.00e- 3 **
										68 IMP Nectriaceae Phanerochaetaceae 97 28 1974 1.05e- 5 2.00e- 3 **
										69 IMP Nectriaceae Polyporaceae 97 233 15408 4.32e-14 8.16e-12 ****
										70 IMP Nectriaceae Stereaceae 97 12 798. 1.50e- 2 1.00e+ 0 ns
										71 IMP Pleosporaceae Diatrypaceae 15 17 239 1.25e- 6 2.36e- 4 ***
										72 IMP Pleosporaceae Xylariaceae 15 58 781 2.95e- 9 5.58e- 7 ****
										73 IMP Pleosporaceae Agaricaceae 15 92 1162. 2.90e- 7 5.48e- 5 ****
										74 IMP Pleosporaceae Omphalotaceae 15 18 254. 7.63e- 7 1.44e- 4 ***
										75 IMP Pleosporaceae Pleurotaceae 15 13 188. 1.50e- 6 2.84e- 4 ***
										76 IMP Pleosporaceae Psathyrellaceae 15 13 181 9.72e- 6 2.00e- 3 **
										77 IMP Pleosporaceae Strophariaceae 15 18 224. 2.03e- 4 3.80e- 2 *
										78 IMP Pleosporaceae Gloeophyllaceae 15 20 238. 6.35e- 4 1.20e- 1 ns
										79 IMP Pleosporaceae Hymenochaetaceae 15 46 532 3.05e- 4 5.80e- 2 ns
										80 IMP Pleosporaceae Fomitopsidaceae 15 42 572. 1.34e- 8 2.53e- 6 ****
										81 IMP Pleosporaceae Ganodermataceae 15 38 536 4.99e-10 9.43e- 8 ****
										82 IMP Pleosporaceae Meruliaceae 15 42 586. 5.76e-10 1.09e- 7 ****
										83 IMP Pleosporaceae Phanerochaetaceae 15 28 406 8.44e-10 1.60e- 7 ****
										84 IMP Pleosporaceae Polyporaceae 15 233 3221 1.18e-19 2.23e-17 ****
										85 IMP Pleosporaceae Stereaceae 15 12 166. 1.66e- 5 3.00e- 3 **
										86 IMP Diatrypaceae Xylariaceae 17 58 454 3.87e- 1 1.00e+ 0 ns
										87 IMP Diatrypaceae Agaricaceae 17 92 632. 8.30e- 2 1.00e+ 0 ns
										88 IMP Diatrypaceae Omphalotaceae 17 18 154. 1.00e+ 0 1.00e+ 0 ns
										89 IMP Diatrypaceae Pleurotaceae 17 13 117 4.20e- 1 1.00e+ 0 ns
										90 IMP Diatrypaceae Psathyrellaceae 17 13 108. 8.85e- 1 1.00e+ 0 ns
										91 IMP Diatrypaceae Strophariaceae 17 18 120. 9.50e- 2 1.00e+ 0 ns
										92 IMP Diatrypaceae Gloeophyllaceae 17 20 120. 3.60e- 2 1.00e+ 0 ns
										93 IMP Diatrypaceae Hymenochaetaceae 17 46 261 1.20e- 2 1.00e+ 0 ns
										94 IMP Diatrypaceae Fomitopsidaceae 17 42 336. 5.02e- 1 1.00e+ 0 ns
										95 IMP Diatrypaceae Ganodermataceae 17 38 325 9.45e- 1 1.00e+ 0 ns
										96 IMP Diatrypaceae Meruliaceae 17 42 352. 8.78e- 1 1.00e+ 0 ns
										97 IMP Diatrypaceae Phanerochaetaceae 17 28 252 2.16e- 1 1.00e+ 0 ns
										98 IMP Diatrypaceae Polyporaceae 17 233 1918. 6.63e- 1 1.00e+ 0 ns
										99 IMP Diatrypaceae Stereaceae 17 12 99.5 8.40e- 1 1.00e+ 0 ns
										100 IMP Xylariaceae Agaricaceae 58 92 2369 1.00e- 1 1.00e+ 0 ns
										101 IMP Xylariaceae Omphalotaceae 58 18 565 3.54e- 1 1.00e+ 0 ns
										102 IMP Xylariaceae Pleurotaceae 58 13 429 1.62e- 1 1.00e+ 0 ns
										103 IMP Xylariaceae Psathyrellaceae 58 13 400 5.62e- 1 1.00e+ 0 ns
										104 IMP Xylariaceae Strophariaceae 58 18 449 1.74e- 1 1.00e+ 0 ns
										105 IMP Xylariaceae Gloeophyllaceae 58 20 457 4.00e- 2 1.00e+ 0 ns
										106 IMP Xylariaceae Hymenochaetaceae 58 46 996 3.00e- 3 6.10e- 1 ns
										107 IMP Xylariaceae Fomitopsidaceae 58 42 1241 7.87e- 1 1.00e+ 0 ns
										108 IMP Xylariaceae Ganodermataceae 58 38 1196 1.86e- 1 1.00e+ 0 ns
										109 IMP Xylariaceae Meruliaceae 58 42 1299 3.00e- 1 1.00e+ 0 ns
										110 IMP Xylariaceae Phanerochaetaceae 58 28 924 4.10e- 2 1.00e+ 0 ns
										111 IMP Xylariaceae Polyporaceae 58 233 7080 2.78e- 1 1.00e+ 0 ns
										112 IMP Xylariaceae Stereaceae 58 12 367 6.19e- 1 1.00e+ 0 ns
										113 IMP Agaricaceae Omphalotaceae 92 18 989 7.00e- 2 1.00e+ 0 ns
										114 IMP Agaricaceae Pleurotaceae 92 13 748. 4.30e- 2 1.00e+ 0 ns
										115 IMP Agaricaceae Psathyrellaceae 92 13 702. 1.68e- 1 1.00e+ 0 ns
										116 IMP Agaricaceae Strophariaceae 92 18 805 8.10e- 1 1.00e+ 0 ns
										117 IMP Agaricaceae Gloeophyllaceae 92 20 828 3.65e- 1 1.00e+ 0 ns
										118 IMP Agaricaceae Hymenochaetaceae 92 46 1817 8.80e- 2 1.00e+ 0 ns
										119 IMP Agaricaceae Fomitopsidaceae 92 42 2185 8.60e- 2 1.00e+ 0 ns
										120 IMP Agaricaceae Ganodermataceae 92 38 2093 1.00e- 2 1.00e+ 0 ns
										121 IMP Agaricaceae Meruliaceae 92 42 2277 1.60e- 2 1.00e+ 0 ns
										122 IMP Agaricaceae Phanerochaetaceae 92 28 1610 3.00e- 3 6.48e- 1 ns
										123 IMP Agaricaceae Polyporaceae 92 233 12432. 1.52e- 4 2.90e- 2 *
										124 IMP Agaricaceae Stereaceae 92 12 644 2.02e- 1 1.00e+ 0 ns
										125 IMP Omphalotaceae Pleurotaceae 18 13 124. 4.33e- 1 1.00e+ 0 ns
										126 IMP Omphalotaceae Psathyrellaceae 18 13 114. 8.51e- 1 1.00e+ 0 ns
										127 IMP Omphalotaceae Strophariaceae 18 18 126 8.20e- 2 1.00e+ 0 ns
										128 IMP Omphalotaceae Gloeophyllaceae 18 20 127 3.00e- 2 1.00e+ 0 ns
										129 IMP Omphalotaceae Hymenochaetaceae 18 46 275 9.00e- 3 1.00e+ 0 ns
										130 IMP Omphalotaceae Fomitopsidaceae 18 42 354 4.66e- 1 1.00e+ 0 ns
										131 IMP Omphalotaceae Ganodermataceae 18 38 343 9.82e- 1 1.00e+ 0 ns
										132 IMP Omphalotaceae Meruliaceae 18 42 372 8.37e- 1 1.00e+ 0 ns
										133 IMP Omphalotaceae Phanerochaetaceae 18 28 266 2.29e- 1 1.00e+ 0 ns
										134 IMP Omphalotaceae Polyporaceae 18 233 2024. 6.20e- 1 1.00e+ 0 ns
										135 IMP Omphalotaceae Stereaceae 18 12 105 8.07e- 1 1.00e+ 0 ns
										136 IMP Pleurotaceae Psathyrellaceae 13 13 78 3.56e- 1 1.00e+ 0 ns
										137 IMP Pleurotaceae Strophariaceae 13 18 84.5 4.40e- 2 1.00e+ 0 ns
										138 IMP Pleurotaceae Gloeophyllaceae 13 20 84.5 1.90e- 2 1.00e+ 0 ns
										139 IMP Pleurotaceae Hymenochaetaceae 13 46 182 8.00e- 3 1.00e+ 0 ns
										140 IMP Pleurotaceae Fomitopsidaceae 13 42 240. 2.03e- 1 1.00e+ 0 ns
										141 IMP Pleurotaceae Ganodermataceae 13 38 234 4.22e- 1 1.00e+ 0 ns
										142 IMP Pleurotaceae Meruliaceae 13 42 254. 3.39e- 1 1.00e+ 0 ns
										143 IMP Pleurotaceae Phanerochaetaceae 13 28 182 NaN NaN ?
										144 IMP Pleurotaceae Polyporaceae 13 233 1378 2.60e- 1 1.00e+ 0 ns
										145 IMP Pleurotaceae Stereaceae 13 12 71.5 3.37e- 1 1.00e+ 0 ns
										146 IMP Psathyrellaceae Strophariaceae 13 18 93.5 1.79e- 1 1.00e+ 0 ns
										147 IMP Psathyrellaceae Gloeophyllaceae 13 20 94.5 8.20e- 2 1.00e+ 0 ns
										148 IMP Psathyrellaceae Hymenochaetaceae 13 46 205 3.50e- 2 1.00e+ 0 ns
										149 IMP Psathyrellaceae Fomitopsidaceae 13 42 262. 6.87e- 1 1.00e+ 0 ns
										150 IMP Psathyrellaceae Ganodermataceae 13 38 253 7.71e- 1 1.00e+ 0 ns
										151 IMP Psathyrellaceae Meruliaceae 13 42 274. 9.65e- 1 1.00e+ 0 ns
										152 IMP Psathyrellaceae Phanerochaetaceae 13 28 196 1.57e- 1 1.00e+ 0 ns
										153 IMP Psathyrellaceae Polyporaceae 13 233 1494. 8.74e- 1 1.00e+ 0 ns
										154 IMP Psathyrellaceae Stereaceae 13 12 77.5 1.00e+ 0 1.00e+ 0 ns
										155 IMP Strophariaceae Gloeophyllaceae 18 20 167 6.50e- 1 1.00e+ 0 ns
										156 IMP Strophariaceae Hymenochaetaceae 18 46 367 4.04e- 1 1.00e+ 0 ns
										157 IMP Strophariaceae Fomitopsidaceae 18 42 438 1.37e- 1 1.00e+ 0 ns
										158 IMP Strophariaceae Ganodermataceae 18 38 419 1.90e- 2 1.00e+ 0 ns
										159 IMP Strophariaceae Meruliaceae 18 42 456 3.40e- 2 1.00e+ 0 ns
										160 IMP Strophariaceae Phanerochaetaceae 18 28 322 4.00e- 3 7.03e- 1 ns
										161 IMP Strophariaceae Polyporaceae 18 233 2490. 1.20e- 2 1.00e+ 0 ns
										162 IMP Strophariaceae Stereaceae 18 12 129 2.11e- 1 1.00e+ 0 ns
										163 IMP Gloeophyllaceae Hymenochaetaceae 20 46 441 7.59e- 1 1.00e+ 0 ns
										164 IMP Gloeophyllaceae Fomitopsidaceae 20 42 517 3.40e- 2 1.00e+ 0 ns
										165 IMP Gloeophyllaceae Ganodermataceae 20 38 493 3.00e- 3 6.31e- 1 ns
										166 IMP Gloeophyllaceae Meruliaceae 20 42 537 6.00e- 3 1.00e+ 0 ns
										167 IMP Gloeophyllaceae Phanerochaetaceae 20 28 378 8.54e- 4 1.61e- 1 ns
										168 IMP Gloeophyllaceae Polyporaceae 20 233 2936. 3.93e- 4 7.40e- 2 ns
										169 IMP Gloeophyllaceae Stereaceae 20 12 152 1.02e- 1 1.00e+ 0 ns
										170 IMP Hymenochaetaceae Fomitopsidaceae 46 42 1229 4.00e- 3 7.48e- 1 ns
										171 IMP Hymenochaetaceae Ganodermataceae 46 38 1170 3.19e- 4 6.00e- 2 ns
										172 IMP Hymenochaetaceae Meruliaceae 46 42 1275 4.82e- 4 9.10e- 2 ns
										173 IMP Hymenochaetaceae Phanerochaetaceae 46 28 896 1.62e- 4 3.10e- 2 *
										174 IMP Hymenochaetaceae Polyporaceae 46 233 6973 7.79e- 8 1.47e- 5 ****
										175 IMP Hymenochaetaceae Stereaceae 46 12 361 4.60e- 2 1.00e+ 0 ns
										176 IMP Fomitopsidaceae Ganodermataceae 42 38 851 3.01e- 1 1.00e+ 0 ns
										177 IMP Fomitopsidaceae Meruliaceae 42 42 924 4.65e- 1 1.00e+ 0 ns
										178 IMP Fomitopsidaceae Phanerochaetaceae 42 28 658 6.20e- 2 1.00e+ 0 ns
										179 IMP Fomitopsidaceae Polyporaceae 42 233 5034. 5.58e- 1 1.00e+ 0 ns
										180 IMP Fomitopsidaceae Stereaceae 42 12 261 7.45e- 1 1.00e+ 0 ns
										181 IMP Ganodermataceae Meruliaceae 38 42 783 7.39e- 1 1.00e+ 0 ns
										182 IMP Ganodermataceae Phanerochaetaceae 38 28 560 2.30e- 1 1.00e+ 0 ns
										183 IMP Ganodermataceae Polyporaceae 38 233 4261 4.44e- 1 1.00e+ 0 ns
										184 IMP Ganodermataceae Stereaceae 38 12 221 7.20e- 1 1.00e+ 0 ns
										185 IMP Meruliaceae Phanerochaetaceae 42 28 630 1.56e- 1 1.00e+ 0 ns
										186 IMP Meruliaceae Polyporaceae 42 233 4802. 6.95e- 1 1.00e+ 0 ns
										187 IMP Meruliaceae Stereaceae 42 12 249 9.09e- 1 1.00e+ 0 ns
										188 IMP Phanerochaetaceae Polyporaceae 28 233 2968 9.90e- 2 1.00e+ 0 ns
										189 IMP Phanerochaetaceae Stereaceae 28 12 154 1.41e- 1 1.00e+ 0 ns
										190 IMP Polyporaceae Stereaceae 233 12 1408. 9.39e- 1 1.00e+ 0 ns
